# Supplementary material for: Diagnosis of Invasive Meningioma Based on Brain-Tumor Interface Radiomics Features on Brain MR Images: A Multicenter Study
Source: Front Oncol. 2021 Aug 20;11:708040. doi: 10.3389/fonc.2021.708040 (PMC8422846; doi:10.3389/fonc.2021.708040)
Supplement: Supplementary file 6 [file Table_1.xlsx]

## Sheet: BTI-2mm
original_shape_LeastAxisLength
original_shape_SurfaceArea
original_shape_VoxelVolume
original_firstorder_InterquartileRange
original_firstorder_Mean
original_firstorder_RootMeanSquared
original_firstorder_Variance
original_glcm_ClusterProminence
original_glcm_Contrast
original_glcm_Imc1
original_glcm_Idm
original_glszm_LargeAreaEmphasis
original_glszm_LargeAreaHighGrayLevelEmphasis
original_glszm_LowGrayLevelZoneEmphasis
original_glszm_ZonePercentage
original_glrlm_LongRunHighGrayLevelEmphasis
original_glrlm_ShortRunLowGrayLevelEmphasis
original_ngtdm_Complexity
original_gldm_DependenceNonUniformityNormalized
original_gldm_SmallDependenceHighGrayLevelEmphasis
log-sigma-3-0-mm-3D_firstorder_Mean
log-sigma-3-0-mm-3D_firstorder_Variance
log-sigma-3-0-mm-3D_glcm_ClusterProminence
log-sigma-3-0-mm-3D_glcm_Contrast
log-sigma-3-0-mm-3D_glcm_Idm
log-sigma-3-0-mm-3D_glszm_LargeAreaEmphasis
log-sigma-3-0-mm-3D_glszm_LargeAreaHighGrayLevelEmphasis
log-sigma-3-0-mm-3D_glszm_ZonePercentage
log-sigma-3-0-mm-3D_glrlm_ShortRunLowGrayLevelEmphasis
log-sigma-3-0-mm-3D_gldm_DependenceNonUniformityNormalized
log-sigma-3-0-mm-3D_gldm_LargeDependenceEmphasis
log-sigma-3-0-mm-3D_gldm_LargeDependenceHighGrayLevelEmphasis
log-sigma-3-0-mm-3D_gldm_LargeDependenceLowGrayLevelEmphasis
log-sigma-3-0-mm-3D_gldm_SmallDependenceHighGrayLevelEmphasis
log-sigma-3-0-mm-3D_gldm_SmallDependenceLowGrayLevelEmphasis
log-sigma-5-0-mm-3D_firstorder_InterquartileRange
log-sigma-5-0-mm-3D_firstorder_RootMeanSquared
log-sigma-5-0-mm-3D_firstorder_TotalEnergy
log-sigma-5-0-mm-3D_firstorder_Variance
log-sigma-5-0-mm-3D_glcm_JointAverage
log-sigma-5-0-mm-3D_glcm_Contrast
log-sigma-5-0-mm-3D_glcm_DifferenceAverage
log-sigma-5-0-mm-3D_glcm_JointEntropy
log-sigma-5-0-mm-3D_glcm_Imc1
log-sigma-5-0-mm-3D_glcm_Id
log-sigma-5-0-mm-3D_glszm_LargeAreaEmphasis
log-sigma-5-0-mm-3D_glszm_LargeAreaHighGrayLevelEmphasis
log-sigma-5-0-mm-3D_glszm_SizeZoneNonUniformityNormalized
log-sigma-5-0-mm-3D_glszm_SmallAreaHighGrayLevelEmphasis
log-sigma-5-0-mm-3D_glszm_SmallAreaLowGrayLevelEmphasis
log-sigma-5-0-mm-3D_glszm_ZonePercentage
log-sigma-5-0-mm-3D_glrlm_ShortRunLowGrayLevelEmphasis
log-sigma-5-0-mm-3D_ngtdm_Complexity
log-sigma-5-0-mm-3D_ngtdm_Contrast
log-sigma-5-0-mm-3D_gldm_DependenceNonUniformity
log-sigma-5-0-mm-3D_gldm_DependenceNonUniformityNormalized
log-sigma-5-0-mm-3D_gldm_LargeDependenceEmphasis
log-sigma-5-0-mm-3D_gldm_LargeDependenceHighGrayLevelEmphasis
log-sigma-5-0-mm-3D_gldm_LargeDependenceLowGrayLevelEmphasis
log-sigma-5-0-mm-3D_gldm_SmallDependenceHighGrayLevelEmphasis
wavelet-LLH_firstorder_10Percentile
wavelet-LLH_firstorder_InterquartileRange
wavelet-LLH_firstorder_Kurtosis
wavelet-LLH_firstorder_MeanAbsoluteDeviation
wavelet-LLH_firstorder_Mean
wavelet-LLH_firstorder_RobustMeanAbsoluteDeviation
wavelet-LLH_glcm_JointAverage
wavelet-LLH_glcm_Contrast
wavelet-LLH_glcm_DifferenceEntropy
wavelet-LLH_glcm_JointEnergy
wavelet-LLH_glcm_JointEntropy
wavelet-LLH_glcm_Imc1
wavelet-LLH_glcm_Idm
wavelet-LLH_glcm_Id
wavelet-LLH_glszm_GrayLevelNonUniformity
wavelet-LLH_glszm_LargeAreaEmphasis
wavelet-LLH_glszm_LargeAreaHighGrayLevelEmphasis
wavelet-LLH_glszm_SizeZoneNonUniformityNormalized
wavelet-LLH_glszm_SmallAreaHighGrayLevelEmphasis
wavelet-LLH_glszm_ZonePercentage
wavelet-LLH_glrlm_ShortRunLowGrayLevelEmphasis
wavelet-LLH_ngtdm_Complexity
wavelet-LLH_ngtdm_Contrast
wavelet-LLH_ngtdm_Strength
wavelet-LLH_gldm_DependenceNonUniformityNormalized
wavelet-LLH_gldm_LargeDependenceEmphasis
wavelet-LLH_gldm_LargeDependenceHighGrayLevelEmphasis
wavelet-LLH_gldm_LargeDependenceLowGrayLevelEmphasis
wavelet-LLH_gldm_SmallDependenceHighGrayLevelEmphasis
wavelet-LLH_gldm_SmallDependenceLowGrayLevelEmphasis
wavelet-LHL_firstorder_10Percentile
wavelet-LHL_firstorder_InterquartileRange
wavelet-LHL_firstorder_Kurtosis
wavelet-LHL_firstorder_MeanAbsoluteDeviation
wavelet-LHL_glcm_JointAverage
wavelet-LHL_glcm_ClusterProminence
wavelet-LHL_glcm_ClusterTendency
wavelet-LHL_glcm_Contrast
wavelet-LHL_glcm_DifferenceEntropy
wavelet-LHL_glcm_Imc1
wavelet-LHL_glcm_Idm
wavelet-LHL_glszm_LargeAreaEmphasis
wavelet-LHL_glszm_ZonePercentage
wavelet-LHL_glrlm_LongRunEmphasis
wavelet-LHL_glrlm_ShortRunLowGrayLevelEmphasis
wavelet-LHL_ngtdm_Coarseness
wavelet-LHL_ngtdm_Complexity
wavelet-LHL_ngtdm_Contrast
wavelet-LHL_gldm_DependenceNonUniformityNormalized
wavelet-LHL_gldm_LargeDependenceHighGrayLevelEmphasis
wavelet-LHL_gldm_SmallDependenceHighGrayLevelEmphasis
wavelet-LHH_firstorder_10Percentile
wavelet-LHH_glcm_DifferenceVariance
wavelet-LHH_glcm_JointEntropy
wavelet-LHH_glcm_Imc1
wavelet-LHH_glcm_Idm
wavelet-LHH_glszm_GrayLevelNonUniformity
wavelet-LHH_glszm_LargeAreaEmphasis
wavelet-LHH_glszm_LargeAreaHighGrayLevelEmphasis
wavelet-LHH_glszm_SizeZoneNonUniformityNormalized
wavelet-LHH_glszm_SmallAreaHighGrayLevelEmphasis
wavelet-LHH_glszm_SmallAreaLowGrayLevelEmphasis
wavelet-LHH_glszm_ZonePercentage
wavelet-LHH_glrlm_ShortRunLowGrayLevelEmphasis
wavelet-LHH_ngtdm_Complexity
wavelet-LHH_ngtdm_Contrast
wavelet-LHH_ngtdm_Strength
wavelet-LHH_gldm_DependenceNonUniformity
wavelet-LHH_gldm_DependenceNonUniformityNormalized
wavelet-LHH_gldm_LargeDependenceEmphasis
wavelet-LHH_gldm_LargeDependenceHighGrayLevelEmphasis
wavelet-LHH_gldm_SmallDependenceEmphasis
wavelet-LHH_gldm_SmallDependenceHighGrayLevelEmphasis
wavelet-LHH_gldm_SmallDependenceLowGrayLevelEmphasis
wavelet-HLL_firstorder_10Percentile
wavelet-HLL_firstorder_InterquartileRange
wavelet-HLL_firstorder_Kurtosis
wavelet-HLL_glcm_JointAverage
wavelet-HLL_glcm_Contrast
wavelet-HLL_glcm_DifferenceAverage
wavelet-HLL_glcm_DifferenceEntropy
wavelet-HLL_glcm_DifferenceVariance
wavelet-HLL_glcm_Imc1
wavelet-HLL_glcm_Idm
wavelet-HLL_glszm_LargeAreaEmphasis
wavelet-HLL_glszm_ZonePercentage
wavelet-HLL_glrlm_LongRunHighGrayLevelEmphasis
wavelet-HLL_glrlm_ShortRunLowGrayLevelEmphasis
wavelet-HLL_ngtdm_Coarseness
wavelet-HLL_ngtdm_Complexity
wavelet-HLL_ngtdm_Contrast
wavelet-HLL_gldm_DependenceNonUniformityNormalized
wavelet-HLL_gldm_LargeDependenceHighGrayLevelEmphasis
wavelet-HLH_firstorder_10Percentile
wavelet-HLH_firstorder_InterquartileRange
wavelet-HLH_firstorder_Kurtosis
wavelet-HLH_firstorder_MeanAbsoluteDeviation
wavelet-HLH_glcm_ClusterProminence
wavelet-HLH_glcm_Contrast
wavelet-HLH_glcm_DifferenceVariance
wavelet-HLH_glcm_JointEntropy
wavelet-HLH_glcm_Imc1
wavelet-HLH_glcm_Id
wavelet-HLH_glszm_GrayLevelNonUniformity
wavelet-HLH_glszm_LargeAreaEmphasis
wavelet-HLH_glszm_LargeAreaHighGrayLevelEmphasis
wavelet-HLH_glszm_SmallAreaHighGrayLevelEmphasis
wavelet-HLH_glszm_SmallAreaLowGrayLevelEmphasis
wavelet-HLH_glszm_ZonePercentage
wavelet-HLH_glrlm_ShortRunHighGrayLevelEmphasis
wavelet-HLH_glrlm_ShortRunLowGrayLevelEmphasis
wavelet-HLH_ngtdm_Strength
wavelet-HLH_gldm_DependenceNonUniformityNormalized
wavelet-HLH_gldm_LargeDependenceEmphasis
wavelet-HLH_gldm_LargeDependenceHighGrayLevelEmphasis
wavelet-HLH_gldm_SmallDependenceHighGrayLevelEmphasis
wavelet-HHL_firstorder_InterquartileRange
wavelet-HHL_firstorder_Kurtosis
wavelet-HHL_glcm_JointAverage
wavelet-HHL_glcm_JointEntropy
wavelet-HHL_glcm_Imc1
wavelet-HHL_glcm_Id
wavelet-HHL_glcm_MaximumProbability
wavelet-HHL_glszm_GrayLevelNonUniformity
wavelet-HHL_glszm_GrayLevelNonUniformityNormalized
wavelet-HHL_glszm_LargeAreaEmphasis
wavelet-HHL_glszm_LargeAreaHighGrayLevelEmphasis
wavelet-HHL_glszm_SizeZoneNonUniformityNormalized
wavelet-HHL_glszm_ZonePercentage
wavelet-HHL_glrlm_LongRunEmphasis
wavelet-HHL_glrlm_ShortRunLowGrayLevelEmphasis
wavelet-HHL_ngtdm_Complexity
wavelet-HHL_ngtdm_Contrast
wavelet-HHL_gldm_DependenceNonUniformityNormalized
wavelet-HHL_gldm_LargeDependenceEmphasis
wavelet-HHH_firstorder_InterquartileRange
wavelet-HHH_firstorder_MeanAbsoluteDeviation
wavelet-HHH_glcm_JointAverage
wavelet-HHH_glcm_DifferenceVariance
wavelet-HHH_glcm_JointEntropy
wavelet-HHH_glcm_Imc1
wavelet-HHH_glcm_Id
wavelet-HHH_glszm_GrayLevelNonUniformity
wavelet-HHH_glszm_LargeAreaEmphasis
wavelet-HHH_glszm_LargeAreaHighGrayLevelEmphasis
wavelet-HHH_glszm_SizeZoneNonUniformity
wavelet-HHH_glszm_SmallAreaHighGrayLevelEmphasis
wavelet-HHH_glszm_SmallAreaLowGrayLevelEmphasis
wavelet-HHH_glszm_ZonePercentage
wavelet-HHH_glrlm_ShortRunLowGrayLevelEmphasis
wavelet-HHH_ngtdm_Strength
wavelet-HHH_gldm_DependenceNonUniformity
wavelet-HHH_gldm_DependenceNonUniformityNormalized
wavelet-HHH_gldm_HighGrayLevelEmphasis
wavelet-HHH_gldm_LargeDependenceEmphasis
wavelet-HHH_gldm_LargeDependenceHighGrayLevelEmphasis
wavelet-HHH_gldm_SmallDependenceHighGrayLevelEmphasis
wavelet-LLL_firstorder_Entropy
wavelet-LLL_firstorder_RootMeanSquared
wavelet-LLL_glcm_JointAverage
wavelet-LLL_glcm_ClusterProminence
wavelet-LLL_glcm_Imc1
wavelet-LLL_glcm_Id
wavelet-LLL_glszm_ZonePercentage
wavelet-LLL_glrlm_ShortRunLowGrayLevelEmphasis
wavelet-LLL_ngtdm_Coarseness
wavelet-LLL_ngtdm_Complexity
wavelet-LLL_gldm_LargeDependenceEmphasis
wavelet-LLL_gldm_LargeDependenceHighGrayLevelEmphasis
wavelet-LLL_gldm_SmallDependenceLowGrayLevelEmphasis

## Sheet: BTI-3mm
original_shape_LeastAxisLength
original_shape_SurfaceArea
original_shape_VoxelVolume
original_firstorder_InterquartileRange
original_firstorder_Mean
original_firstorder_RootMeanSquared
original_glcm_Autocorrelation
original_glcm_Contrast
original_glcm_Idm
original_glcm_InverseVariance
original_glszm_LargeAreaEmphasis
original_glszm_LargeAreaHighGrayLevelEmphasis
original_glszm_ZonePercentage
original_glrlm_LongRunHighGrayLevelEmphasis
original_glrlm_ShortRunLowGrayLevelEmphasis
original_gldm_DependenceNonUniformityNormalized
log-sigma-3-0-mm-3D_firstorder_Mean
log-sigma-3-0-mm-3D_glcm_ClusterProminence
log-sigma-3-0-mm-3D_glcm_Contrast
log-sigma-3-0-mm-3D_glcm_Idm
log-sigma-3-0-mm-3D_glszm_LargeAreaEmphasis
log-sigma-3-0-mm-3D_glszm_LargeAreaHighGrayLevelEmphasis
log-sigma-3-0-mm-3D_glszm_SizeZoneNonUniformityNormalized
log-sigma-3-0-mm-3D_glszm_ZonePercentage
log-sigma-3-0-mm-3D_glrlm_LongRunEmphasis
log-sigma-3-0-mm-3D_glrlm_ShortRunLowGrayLevelEmphasis
log-sigma-3-0-mm-3D_gldm_DependenceNonUniformityNormalized
log-sigma-3-0-mm-3D_gldm_LargeDependenceEmphasis
log-sigma-3-0-mm-3D_gldm_LargeDependenceHighGrayLevelEmphasis
log-sigma-3-0-mm-3D_gldm_LargeDependenceLowGrayLevelEmphasis
log-sigma-3-0-mm-3D_gldm_SmallDependenceHighGrayLevelEmphasis
log-sigma-3-0-mm-3D_gldm_SmallDependenceLowGrayLevelEmphasis
log-sigma-5-0-mm-3D_firstorder_InterquartileRange
log-sigma-5-0-mm-3D_firstorder_RootMeanSquared
log-sigma-5-0-mm-3D_firstorder_TotalEnergy
log-sigma-5-0-mm-3D_glcm_JointAverage
log-sigma-5-0-mm-3D_glcm_Contrast
log-sigma-5-0-mm-3D_glcm_DifferenceVariance
log-sigma-5-0-mm-3D_glcm_JointEnergy
log-sigma-5-0-mm-3D_glcm_JointEntropy
log-sigma-5-0-mm-3D_glcm_Imc1
log-sigma-5-0-mm-3D_glcm_Id
log-sigma-5-0-mm-3D_glcm_SumSquares
log-sigma-5-0-mm-3D_glszm_LargeAreaEmphasis
log-sigma-5-0-mm-3D_glszm_LargeAreaHighGrayLevelEmphasis
log-sigma-5-0-mm-3D_glszm_SizeZoneNonUniformityNormalized
log-sigma-5-0-mm-3D_glszm_SmallAreaHighGrayLevelEmphasis
log-sigma-5-0-mm-3D_glszm_SmallAreaLowGrayLevelEmphasis
log-sigma-5-0-mm-3D_glszm_ZonePercentage
log-sigma-5-0-mm-3D_glrlm_LongRunEmphasis
log-sigma-5-0-mm-3D_glrlm_ShortRunLowGrayLevelEmphasis
log-sigma-5-0-mm-3D_ngtdm_Busyness
log-sigma-5-0-mm-3D_ngtdm_Contrast
log-sigma-5-0-mm-3D_gldm_DependenceNonUniformityNormalized
log-sigma-5-0-mm-3D_gldm_LargeDependenceEmphasis
log-sigma-5-0-mm-3D_gldm_LargeDependenceHighGrayLevelEmphasis
log-sigma-5-0-mm-3D_gldm_LargeDependenceLowGrayLevelEmphasis
log-sigma-5-0-mm-3D_gldm_SmallDependenceHighGrayLevelEmphasis
wavelet-LLH_firstorder_10Percentile
wavelet-LLH_firstorder_InterquartileRange
wavelet-LLH_firstorder_Kurtosis
wavelet-LLH_firstorder_MeanAbsoluteDeviation
wavelet-LLH_firstorder_Mean
wavelet-LLH_firstorder_RobustMeanAbsoluteDeviation
wavelet-LLH_glcm_JointAverage
wavelet-LLH_glcm_Contrast
wavelet-LLH_glcm_DifferenceVariance
wavelet-LLH_glcm_JointEnergy
wavelet-LLH_glcm_JointEntropy
wavelet-LLH_glcm_Imc1
wavelet-LLH_glcm_Idm
wavelet-LLH_glcm_Id
wavelet-LLH_glszm_GrayLevelNonUniformity
wavelet-LLH_glszm_LargeAreaEmphasis
wavelet-LLH_glszm_LargeAreaHighGrayLevelEmphasis
wavelet-LLH_glszm_SizeZoneNonUniformityNormalized
wavelet-LLH_glszm_SmallAreaEmphasis
wavelet-LLH_glszm_ZonePercentage
wavelet-LLH_glrlm_ShortRunLowGrayLevelEmphasis
wavelet-LLH_ngtdm_Complexity
wavelet-LLH_ngtdm_Contrast
wavelet-LLH_ngtdm_Strength
wavelet-LLH_gldm_DependenceNonUniformityNormalized
wavelet-LLH_gldm_LargeDependenceEmphasis
wavelet-LLH_gldm_LargeDependenceHighGrayLevelEmphasis
wavelet-LLH_gldm_LargeDependenceLowGrayLevelEmphasis
wavelet-LLH_gldm_SmallDependenceHighGrayLevelEmphasis
wavelet-LLH_gldm_SmallDependenceLowGrayLevelEmphasis
wavelet-LHL_firstorder_InterquartileRange
wavelet-LHL_firstorder_Kurtosis
wavelet-LHL_firstorder_MeanAbsoluteDeviation
wavelet-LHL_glcm_JointAverage
wavelet-LHL_glcm_ClusterProminence
wavelet-LHL_glcm_Contrast
wavelet-LHL_glcm_DifferenceEntropy
wavelet-LHL_glcm_Idm
wavelet-LHL_glcm_InverseVariance
wavelet-LHL_glszm_GrayLevelNonUniformity
wavelet-LHL_glszm_LargeAreaEmphasis
wavelet-LHL_glszm_ZonePercentage
wavelet-LHL_glrlm_LongRunEmphasis
wavelet-LHL_glrlm_ShortRunLowGrayLevelEmphasis
wavelet-LHL_ngtdm_Coarseness
wavelet-LHL_ngtdm_Complexity
wavelet-LHL_ngtdm_Contrast
wavelet-LHL_gldm_DependenceNonUniformityNormalized
wavelet-LHL_gldm_LargeDependenceHighGrayLevelEmphasis
wavelet-LHL_gldm_SmallDependenceHighGrayLevelEmphasis
wavelet-LHH_glcm_JointEntropy
wavelet-LHH_glcm_Imc1
wavelet-LHH_glcm_Idm
wavelet-LHH_glszm_GrayLevelNonUniformity
wavelet-LHH_glszm_LargeAreaEmphasis
wavelet-LHH_glszm_LargeAreaHighGrayLevelEmphasis
wavelet-LHH_glszm_SizeZoneNonUniformityNormalized
wavelet-LHH_glszm_SmallAreaHighGrayLevelEmphasis
wavelet-LHH_glszm_SmallAreaLowGrayLevelEmphasis
wavelet-LHH_glszm_ZonePercentage
wavelet-LHH_glrlm_LongRunEmphasis
wavelet-LHH_glrlm_ShortRunLowGrayLevelEmphasis
wavelet-LHH_ngtdm_Complexity
wavelet-LHH_ngtdm_Contrast
wavelet-LHH_ngtdm_Strength
wavelet-LHH_gldm_DependenceNonUniformityNormalized
wavelet-LHH_gldm_LargeDependenceEmphasis
wavelet-LHH_gldm_LargeDependenceHighGrayLevelEmphasis
wavelet-LHH_gldm_SmallDependenceEmphasis
wavelet-LHH_gldm_SmallDependenceHighGrayLevelEmphasis
wavelet-LHH_gldm_SmallDependenceLowGrayLevelEmphasis
wavelet-HLL_firstorder_10Percentile
wavelet-HLL_firstorder_InterquartileRange
wavelet-HLL_firstorder_Kurtosis
wavelet-HLL_glcm_JointAverage
wavelet-HLL_glcm_Contrast
wavelet-HLL_glcm_DifferenceEntropy
wavelet-HLL_glcm_Imc1
wavelet-HLL_glcm_Idm
wavelet-HLL_glszm_GrayLevelNonUniformity
wavelet-HLL_glszm_LargeAreaEmphasis
wavelet-HLL_glszm_ZonePercentage
wavelet-HLL_glrlm_LongRunEmphasis
wavelet-HLL_glrlm_ShortRunLowGrayLevelEmphasis
wavelet-HLL_ngtdm_Complexity
wavelet-HLL_ngtdm_Contrast
wavelet-HLL_gldm_DependenceNonUniformityNormalized
wavelet-HLL_gldm_LargeDependenceHighGrayLevelEmphasis
wavelet-HLH_firstorder_10Percentile
wavelet-HLH_firstorder_InterquartileRange
wavelet-HLH_firstorder_Kurtosis
wavelet-HLH_firstorder_MeanAbsoluteDeviation
wavelet-HLH_glcm_ClusterProminence
wavelet-HLH_glcm_Contrast
wavelet-HLH_glcm_DifferenceVariance
wavelet-HLH_glcm_JointEntropy
wavelet-HLH_glcm_Imc1
wavelet-HLH_glcm_Idm
wavelet-HLH_glszm_GrayLevelNonUniformity
wavelet-HLH_glszm_LargeAreaEmphasis
wavelet-HLH_glszm_LargeAreaHighGrayLevelEmphasis
wavelet-HLH_glszm_SmallAreaHighGrayLevelEmphasis
wavelet-HLH_glszm_SmallAreaLowGrayLevelEmphasis
wavelet-HLH_glszm_ZonePercentage
wavelet-HLH_glrlm_LowGrayLevelRunEmphasis
wavelet-HLH_glrlm_ShortRunHighGrayLevelEmphasis
wavelet-HLH_glrlm_ShortRunLowGrayLevelEmphasis
wavelet-HLH_ngtdm_Strength
wavelet-HLH_gldm_DependenceNonUniformityNormalized
wavelet-HLH_gldm_LargeDependenceEmphasis
wavelet-HLH_gldm_LargeDependenceHighGrayLevelEmphasis
wavelet-HLH_gldm_SmallDependenceHighGrayLevelEmphasis
wavelet-HHL_firstorder_InterquartileRange
wavelet-HHL_firstorder_Kurtosis
wavelet-HHL_glcm_JointAverage
wavelet-HHL_glcm_DifferenceVariance
wavelet-HHL_glcm_Id
wavelet-HHL_glszm_GrayLevelNonUniformity
wavelet-HHL_glszm_GrayLevelNonUniformityNormalized
wavelet-HHL_glszm_LargeAreaEmphasis
wavelet-HHL_glszm_SizeZoneNonUniformityNormalized
wavelet-HHL_glszm_SmallAreaLowGrayLevelEmphasis
wavelet-HHL_glszm_ZonePercentage
wavelet-HHL_glrlm_LongRunEmphasis
wavelet-HHL_glrlm_ShortRunLowGrayLevelEmphasis
wavelet-HHL_ngtdm_Complexity
wavelet-HHL_ngtdm_Contrast
wavelet-HHL_gldm_DependenceNonUniformityNormalized
wavelet-HHL_gldm_LargeDependenceEmphasis
wavelet-HHL_gldm_LargeDependenceHighGrayLevelEmphasis
wavelet-HHL_gldm_SmallDependenceHighGrayLevelEmphasis
wavelet-HHH_firstorder_InterquartileRange
wavelet-HHH_firstorder_Kurtosis
wavelet-HHH_firstorder_MeanAbsoluteDeviation
wavelet-HHH_glcm_JointAverage
wavelet-HHH_glcm_JointEntropy
wavelet-HHH_glcm_Imc1
wavelet-HHH_glcm_Id
wavelet-HHH_glszm_GrayLevelNonUniformity
wavelet-HHH_glszm_LargeAreaEmphasis
wavelet-HHH_glszm_LargeAreaHighGrayLevelEmphasis
wavelet-HHH_glszm_SizeZoneNonUniformity
wavelet-HHH_glszm_SmallAreaLowGrayLevelEmphasis
wavelet-HHH_glrlm_LowGrayLevelRunEmphasis
wavelet-HHH_glrlm_ShortRunHighGrayLevelEmphasis
wavelet-HHH_ngtdm_Strength
wavelet-HHH_gldm_DependenceNonUniformity
wavelet-HHH_gldm_DependenceNonUniformityNormalized
wavelet-HHH_gldm_LargeDependenceEmphasis
wavelet-HHH_gldm_LargeDependenceHighGrayLevelEmphasis
wavelet-HHH_gldm_SmallDependenceHighGrayLevelEmphasis
wavelet-LLL_firstorder_Entropy
wavelet-LLL_firstorder_RootMeanSquared
wavelet-LLL_firstorder_TotalEnergy
wavelet-LLL_glcm_JointAverage
wavelet-LLL_glcm_ClusterProminence
wavelet-LLL_glcm_Contrast
wavelet-LLL_glcm_DifferenceVariance
wavelet-LLL_glcm_Imc1
wavelet-LLL_glcm_Id
wavelet-LLL_glszm_ZonePercentage
wavelet-LLL_glrlm_ShortRunLowGrayLevelEmphasis
wavelet-LLL_ngtdm_Coarseness
wavelet-LLL_ngtdm_Complexity
wavelet-LLL_gldm_LargeDependenceEmphasis
wavelet-LLL_gldm_LargeDependenceHighGrayLevelEmphasis
wavelet-LLL_gldm_SmallDependenceLowGrayLevelEmphasis

## Sheet: BTI-4mm
original_shape_LeastAxisLength
original_shape_SurfaceArea
original_shape_VoxelVolume
original_firstorder_InterquartileRange
original_firstorder_Mean
original_firstorder_RootMeanSquared
original_firstorder_TotalEnergy
original_glcm_Autocorrelation
original_glcm_Contrast
original_glcm_Idm
original_glcm_InverseVariance
original_glszm_LargeAreaEmphasis
original_glszm_LargeAreaHighGrayLevelEmphasis
original_glszm_ZonePercentage
original_glrlm_LongRunHighGrayLevelEmphasis
original_glrlm_ShortRunLowGrayLevelEmphasis
original_gldm_DependenceNonUniformityNormalized
log-sigma-3-0-mm-3D_firstorder_Mean
log-sigma-3-0-mm-3D_firstorder_Variance
log-sigma-3-0-mm-3D_glcm_ClusterProminence
log-sigma-3-0-mm-3D_glcm_Contrast
log-sigma-3-0-mm-3D_glcm_Idm
log-sigma-3-0-mm-3D_glszm_LargeAreaEmphasis
log-sigma-3-0-mm-3D_glszm_LargeAreaHighGrayLevelEmphasis
log-sigma-3-0-mm-3D_glszm_SizeZoneNonUniformityNormalized
log-sigma-3-0-mm-3D_glszm_ZonePercentage
log-sigma-3-0-mm-3D_glrlm_ShortRunLowGrayLevelEmphasis
log-sigma-3-0-mm-3D_ngtdm_Busyness
log-sigma-3-0-mm-3D_ngtdm_Complexity
log-sigma-3-0-mm-3D_gldm_DependenceNonUniformityNormalized
log-sigma-3-0-mm-3D_gldm_LargeDependenceEmphasis
log-sigma-3-0-mm-3D_gldm_LargeDependenceHighGrayLevelEmphasis
log-sigma-3-0-mm-3D_gldm_LargeDependenceLowGrayLevelEmphasis
log-sigma-3-0-mm-3D_gldm_SmallDependenceHighGrayLevelEmphasis
log-sigma-3-0-mm-3D_gldm_SmallDependenceLowGrayLevelEmphasis
log-sigma-5-0-mm-3D_firstorder_InterquartileRange
log-sigma-5-0-mm-3D_firstorder_RootMeanSquared
log-sigma-5-0-mm-3D_firstorder_Variance
log-sigma-5-0-mm-3D_glcm_JointAverage
log-sigma-5-0-mm-3D_glcm_Contrast
log-sigma-5-0-mm-3D_glcm_DifferenceVariance
log-sigma-5-0-mm-3D_glcm_JointEntropy
log-sigma-5-0-mm-3D_glcm_Imc1
log-sigma-5-0-mm-3D_glcm_Idm
log-sigma-5-0-mm-3D_glcm_SumSquares
log-sigma-5-0-mm-3D_glszm_GrayLevelNonUniformity
log-sigma-5-0-mm-3D_glszm_LargeAreaEmphasis
log-sigma-5-0-mm-3D_glszm_LargeAreaHighGrayLevelEmphasis
log-sigma-5-0-mm-3D_glszm_SizeZoneNonUniformityNormalized
log-sigma-5-0-mm-3D_glszm_SmallAreaHighGrayLevelEmphasis
log-sigma-5-0-mm-3D_glszm_ZonePercentage
log-sigma-5-0-mm-3D_glrlm_ShortRunLowGrayLevelEmphasis
log-sigma-5-0-mm-3D_ngtdm_Contrast
log-sigma-5-0-mm-3D_gldm_DependenceNonUniformityNormalized
log-sigma-5-0-mm-3D_gldm_LargeDependenceEmphasis
log-sigma-5-0-mm-3D_gldm_LargeDependenceHighGrayLevelEmphasis
log-sigma-5-0-mm-3D_gldm_SmallDependenceHighGrayLevelEmphasis
wavelet-LLH_firstorder_10Percentile
wavelet-LLH_firstorder_InterquartileRange
wavelet-LLH_firstorder_Kurtosis
wavelet-LLH_firstorder_MeanAbsoluteDeviation
wavelet-LLH_firstorder_Mean
wavelet-LLH_firstorder_RobustMeanAbsoluteDeviation
wavelet-LLH_glcm_JointAverage
wavelet-LLH_glcm_Contrast
wavelet-LLH_glcm_DifferenceVariance
wavelet-LLH_glcm_JointEnergy
wavelet-LLH_glcm_JointEntropy
wavelet-LLH_glcm_Imc1
wavelet-LLH_glcm_Idm
wavelet-LLH_glcm_Id
wavelet-LLH_glszm_GrayLevelNonUniformity
wavelet-LLH_glszm_LargeAreaEmphasis
wavelet-LLH_glszm_LargeAreaHighGrayLevelEmphasis
wavelet-LLH_glszm_SizeZoneNonUniformityNormalized
wavelet-LLH_glszm_SmallAreaEmphasis
wavelet-LLH_glszm_SmallAreaHighGrayLevelEmphasis
wavelet-LLH_glszm_SmallAreaLowGrayLevelEmphasis
wavelet-LLH_glszm_ZonePercentage
wavelet-LLH_glrlm_ShortRunLowGrayLevelEmphasis
wavelet-LLH_ngtdm_Complexity
wavelet-LLH_ngtdm_Contrast
wavelet-LLH_gldm_DependenceNonUniformityNormalized
wavelet-LLH_gldm_LargeDependenceEmphasis
wavelet-LLH_gldm_LargeDependenceHighGrayLevelEmphasis
wavelet-LLH_gldm_LargeDependenceLowGrayLevelEmphasis
wavelet-LLH_gldm_SmallDependenceHighGrayLevelEmphasis
wavelet-LLH_gldm_SmallDependenceLowGrayLevelEmphasis
wavelet-LHL_firstorder_10Percentile
wavelet-LHL_firstorder_InterquartileRange
wavelet-LHL_firstorder_Kurtosis
wavelet-LHL_firstorder_MeanAbsoluteDeviation
wavelet-LHL_glcm_JointAverage
wavelet-LHL_glcm_ClusterProminence
wavelet-LHL_glcm_Contrast
wavelet-LHL_glcm_DifferenceEntropy
wavelet-LHL_glcm_Idm
wavelet-LHL_glcm_InverseVariance
wavelet-LHL_glszm_LargeAreaEmphasis
wavelet-LHL_glszm_SizeZoneNonUniformityNormalized
wavelet-LHL_glszm_ZonePercentage
wavelet-LHL_glrlm_LongRunEmphasis
wavelet-LHL_glrlm_ShortRunLowGrayLevelEmphasis
wavelet-LHL_ngtdm_Complexity
wavelet-LHL_ngtdm_Contrast
wavelet-LHL_gldm_DependenceNonUniformityNormalized
wavelet-LHL_gldm_LargeDependenceHighGrayLevelEmphasis
wavelet-LHH_glcm_DifferenceVariance
wavelet-LHH_glcm_JointEntropy
wavelet-LHH_glcm_Imc1
wavelet-LHH_glcm_Idm
wavelet-LHH_glszm_GrayLevelNonUniformity
wavelet-LHH_glszm_LargeAreaEmphasis
wavelet-LHH_glszm_LargeAreaHighGrayLevelEmphasis
wavelet-LHH_glszm_SizeZoneNonUniformity
wavelet-LHH_glszm_SmallAreaLowGrayLevelEmphasis
wavelet-LHH_glrlm_LongRunEmphasis
wavelet-LHH_glrlm_ShortRunLowGrayLevelEmphasis
wavelet-LHH_ngtdm_Complexity
wavelet-LHH_ngtdm_Contrast
wavelet-LHH_ngtdm_Strength
wavelet-LHH_gldm_DependenceNonUniformityNormalized
wavelet-LHH_gldm_LargeDependenceEmphasis
wavelet-LHH_gldm_LargeDependenceHighGrayLevelEmphasis
wavelet-LHH_gldm_SmallDependenceEmphasis
wavelet-LHH_gldm_SmallDependenceHighGrayLevelEmphasis
wavelet-LHH_gldm_SmallDependenceLowGrayLevelEmphasis
wavelet-HLL_firstorder_10Percentile
wavelet-HLL_firstorder_InterquartileRange
wavelet-HLL_firstorder_Kurtosis
wavelet-HLL_glcm_JointAverage
wavelet-HLL_glcm_Contrast
wavelet-HLL_glcm_Idm
wavelet-HLL_glszm_GrayLevelNonUniformity
wavelet-HLL_glszm_LargeAreaEmphasis
wavelet-HLL_glszm_ZonePercentage
wavelet-HLL_glrlm_LongRunEmphasis
wavelet-HLL_glrlm_ShortRunLowGrayLevelEmphasis
wavelet-HLL_ngtdm_Contrast
wavelet-HLL_gldm_DependenceNonUniformityNormalized
wavelet-HLL_gldm_LargeDependenceHighGrayLevelEmphasis
wavelet-HLH_firstorder_10Percentile
wavelet-HLH_firstorder_InterquartileRange
wavelet-HLH_firstorder_Kurtosis
wavelet-HLH_firstorder_MeanAbsoluteDeviation
wavelet-HLH_glcm_Contrast
wavelet-HLH_glcm_DifferenceVariance
wavelet-HLH_glcm_JointEntropy
wavelet-HLH_glcm_Imc1
wavelet-HLH_glcm_Idm
wavelet-HLH_glcm_Idn
wavelet-HLH_glszm_GrayLevelNonUniformity
wavelet-HLH_glszm_LargeAreaEmphasis
wavelet-HLH_glszm_LargeAreaHighGrayLevelEmphasis
wavelet-HLH_glszm_SmallAreaLowGrayLevelEmphasis
wavelet-HLH_glszm_ZonePercentage
wavelet-HLH_glrlm_ShortRunHighGrayLevelEmphasis
wavelet-HLH_glrlm_ShortRunLowGrayLevelEmphasis
wavelet-HLH_ngtdm_Strength
wavelet-HLH_gldm_DependenceNonUniformityNormalized
wavelet-HLH_gldm_LargeDependenceEmphasis
wavelet-HLH_gldm_LargeDependenceHighGrayLevelEmphasis
wavelet-HLH_gldm_SmallDependenceHighGrayLevelEmphasis
wavelet-HHL_firstorder_InterquartileRange
wavelet-HHL_firstorder_Kurtosis
wavelet-HHL_glcm_JointAverage
wavelet-HHL_glcm_DifferenceVariance
wavelet-HHL_glcm_JointEntropy
wavelet-HHL_glcm_Id
wavelet-HHL_glcm_InverseVariance
wavelet-HHL_glszm_GrayLevelNonUniformityNormalized
wavelet-HHL_glszm_LargeAreaEmphasis
wavelet-HHL_glszm_LargeAreaHighGrayLevelEmphasis
wavelet-HHL_glszm_SizeZoneNonUniformityNormalized
wavelet-HHL_glszm_SmallAreaHighGrayLevelEmphasis
wavelet-HHL_glszm_ZonePercentage
wavelet-HHL_glrlm_LongRunEmphasis
wavelet-HHL_glrlm_ShortRunLowGrayLevelEmphasis
wavelet-HHL_ngtdm_Complexity
wavelet-HHL_ngtdm_Contrast
wavelet-HHL_gldm_DependenceNonUniformityNormalized
wavelet-HHL_gldm_LargeDependenceEmphasis
wavelet-HHL_gldm_LargeDependenceHighGrayLevelEmphasis
wavelet-HHH_firstorder_InterquartileRange
wavelet-HHH_firstorder_MeanAbsoluteDeviation
wavelet-HHH_glcm_JointAverage
wavelet-HHH_glcm_DifferenceVariance
wavelet-HHH_glcm_JointEntropy
wavelet-HHH_glcm_Imc1
wavelet-HHH_glcm_Id
wavelet-HHH_glszm_GrayLevelNonUniformity
wavelet-HHH_glszm_LargeAreaEmphasis
wavelet-HHH_glszm_LargeAreaHighGrayLevelEmphasis
wavelet-HHH_glszm_SizeZoneNonUniformity
wavelet-HHH_glszm_SmallAreaLowGrayLevelEmphasis
wavelet-HHH_glrlm_LowGrayLevelRunEmphasis
wavelet-HHH_ngtdm_Strength
wavelet-HHH_gldm_DependenceNonUniformity
wavelet-HHH_gldm_DependenceNonUniformityNormalized
wavelet-HHH_gldm_LargeDependenceEmphasis
wavelet-HHH_gldm_LargeDependenceHighGrayLevelEmphasis
wavelet-HHH_gldm_SmallDependenceHighGrayLevelEmphasis
wavelet-LLL_firstorder_Entropy
wavelet-LLL_firstorder_RootMeanSquared
wavelet-LLL_firstorder_TotalEnergy
wavelet-LLL_glcm_ClusterProminence
wavelet-LLL_glcm_DifferenceVariance
wavelet-LLL_glcm_Imc1
wavelet-LLL_glcm_Idm
wavelet-LLL_glszm_ZonePercentage
wavelet-LLL_glrlm_ShortRunLowGrayLevelEmphasis
wavelet-LLL_ngtdm_Coarseness
wavelet-LLL_ngtdm_Complexity
wavelet-LLL_gldm_LargeDependenceEmphasis
wavelet-LLL_gldm_LargeDependenceHighGrayLevelEmphasis
wavelet-LLL_gldm_SmallDependenceLowGrayLevelEmphasis

## Sheet: BTI-5mm
original_shape_SurfaceArea
original_shape_VoxelVolume
original_firstorder_InterquartileRange
original_firstorder_Mean
original_firstorder_RootMeanSquared
original_glcm_Contrast
original_glcm_Idm
original_glcm_InverseVariance
original_glszm_LargeAreaEmphasis
original_glszm_LargeAreaHighGrayLevelEmphasis
original_glszm_SizeZoneNonUniformityNormalized
original_glszm_ZonePercentage
original_glrlm_ShortRunLowGrayLevelEmphasis
original_gldm_DependenceNonUniformityNormalized
original_gldm_LargeDependenceEmphasis
original_gldm_LargeDependenceHighGrayLevelEmphasis
original_gldm_SmallDependenceHighGrayLevelEmphasis
log-sigma-3-0-mm-3D_firstorder_Mean
log-sigma-3-0-mm-3D_firstorder_RobustMeanAbsoluteDeviation
log-sigma-3-0-mm-3D_glcm_ClusterProminence
log-sigma-3-0-mm-3D_glcm_Contrast
log-sigma-3-0-mm-3D_glcm_Idm
log-sigma-3-0-mm-3D_glcm_InverseVariance
log-sigma-3-0-mm-3D_glszm_LargeAreaEmphasis
log-sigma-3-0-mm-3D_glszm_LargeAreaHighGrayLevelEmphasis
log-sigma-3-0-mm-3D_glszm_SizeZoneNonUniformityNormalized
log-sigma-3-0-mm-3D_glszm_ZonePercentage
log-sigma-3-0-mm-3D_glrlm_LongRunEmphasis
log-sigma-3-0-mm-3D_glrlm_ShortRunLowGrayLevelEmphasis
log-sigma-3-0-mm-3D_gldm_DependenceNonUniformityNormalized
log-sigma-3-0-mm-3D_gldm_LargeDependenceEmphasis
log-sigma-3-0-mm-3D_gldm_LargeDependenceHighGrayLevelEmphasis
log-sigma-3-0-mm-3D_gldm_LargeDependenceLowGrayLevelEmphasis
log-sigma-3-0-mm-3D_gldm_SmallDependenceHighGrayLevelEmphasis
log-sigma-5-0-mm-3D_firstorder_InterquartileRange
log-sigma-5-0-mm-3D_firstorder_RootMeanSquared
log-sigma-5-0-mm-3D_glcm_JointAverage
log-sigma-5-0-mm-3D_glcm_Contrast
log-sigma-5-0-mm-3D_glcm_DifferenceVariance
log-sigma-5-0-mm-3D_glcm_JointEntropy
log-sigma-5-0-mm-3D_glcm_Imc1
log-sigma-5-0-mm-3D_glcm_Id
log-sigma-5-0-mm-3D_glszm_GrayLevelNonUniformity
log-sigma-5-0-mm-3D_glszm_LargeAreaEmphasis
log-sigma-5-0-mm-3D_glszm_LargeAreaHighGrayLevelEmphasis
log-sigma-5-0-mm-3D_glszm_SizeZoneNonUniformityNormalized
log-sigma-5-0-mm-3D_glszm_SmallAreaHighGrayLevelEmphasis
log-sigma-5-0-mm-3D_glszm_ZonePercentage
log-sigma-5-0-mm-3D_glrlm_LongRunEmphasis
log-sigma-5-0-mm-3D_glrlm_ShortRunLowGrayLevelEmphasis
log-sigma-5-0-mm-3D_ngtdm_Complexity
log-sigma-5-0-mm-3D_gldm_DependenceNonUniformityNormalized
log-sigma-5-0-mm-3D_gldm_LargeDependenceEmphasis
log-sigma-5-0-mm-3D_gldm_LargeDependenceHighGrayLevelEmphasis
log-sigma-5-0-mm-3D_gldm_SmallDependenceHighGrayLevelEmphasis
wavelet-LLH_firstorder_10Percentile
wavelet-LLH_firstorder_InterquartileRange
wavelet-LLH_firstorder_Kurtosis
wavelet-LLH_firstorder_MeanAbsoluteDeviation
wavelet-LLH_firstorder_Mean
wavelet-LLH_firstorder_RobustMeanAbsoluteDeviation
wavelet-LLH_glcm_JointAverage
wavelet-LLH_glcm_Contrast
wavelet-LLH_glcm_JointEntropy
wavelet-LLH_glcm_Imc1
wavelet-LLH_glcm_Idm
wavelet-LLH_glcm_Id
wavelet-LLH_glcm_InverseVariance
wavelet-LLH_glcm_SumSquares
wavelet-LLH_glszm_GrayLevelNonUniformity
wavelet-LLH_glszm_LargeAreaEmphasis
wavelet-LLH_glszm_LargeAreaHighGrayLevelEmphasis
wavelet-LLH_glszm_SizeZoneNonUniformityNormalized
wavelet-LLH_glszm_SmallAreaEmphasis
wavelet-LLH_glszm_SmallAreaHighGrayLevelEmphasis
wavelet-LLH_glszm_ZonePercentage
wavelet-LLH_glrlm_ShortRunLowGrayLevelEmphasis
wavelet-LLH_ngtdm_Complexity
wavelet-LLH_ngtdm_Contrast
wavelet-LLH_ngtdm_Strength
wavelet-LLH_gldm_DependenceNonUniformityNormalized
wavelet-LLH_gldm_LargeDependenceEmphasis
wavelet-LLH_gldm_LargeDependenceHighGrayLevelEmphasis
wavelet-LLH_gldm_LargeDependenceLowGrayLevelEmphasis
wavelet-LLH_gldm_SmallDependenceHighGrayLevelEmphasis
wavelet-LHL_firstorder_InterquartileRange
wavelet-LHL_firstorder_Kurtosis
wavelet-LHL_firstorder_MeanAbsoluteDeviation
wavelet-LHL_glcm_JointAverage
wavelet-LHL_glcm_ClusterProminence
wavelet-LHL_glcm_Contrast
wavelet-LHL_glcm_DifferenceVariance
wavelet-LHL_glcm_Imc1
wavelet-LHL_glcm_Idm
wavelet-LHL_glszm_GrayLevelNonUniformity
wavelet-LHL_glszm_LargeAreaEmphasis
wavelet-LHL_glszm_LargeAreaHighGrayLevelEmphasis
wavelet-LHL_glszm_SizeZoneNonUniformityNormalized
wavelet-LHL_glszm_ZonePercentage
wavelet-LHL_glrlm_LongRunEmphasis
wavelet-LHL_glrlm_ShortRunLowGrayLevelEmphasis
wavelet-LHL_ngtdm_Coarseness
wavelet-LHL_ngtdm_Complexity
wavelet-LHL_ngtdm_Contrast
wavelet-LHL_gldm_DependenceNonUniformityNormalized
wavelet-LHL_gldm_LargeDependenceEmphasis
wavelet-LHL_gldm_LargeDependenceHighGrayLevelEmphasis
wavelet-LHL_gldm_SmallDependenceHighGrayLevelEmphasis
wavelet-LHH_glcm_JointEntropy
wavelet-LHH_glcm_Imc1
wavelet-LHH_glcm_Idm
wavelet-LHH_glszm_GrayLevelNonUniformity
wavelet-LHH_glszm_LargeAreaEmphasis
wavelet-LHH_glszm_LargeAreaHighGrayLevelEmphasis
wavelet-LHH_glszm_SizeZoneNonUniformity
wavelet-LHH_glszm_SmallAreaHighGrayLevelEmphasis
wavelet-LHH_glszm_ZonePercentage
wavelet-LHH_glrlm_LongRunEmphasis
wavelet-LHH_ngtdm_Strength
wavelet-LHH_gldm_DependenceNonUniformityNormalized
wavelet-LHH_gldm_LargeDependenceEmphasis
wavelet-LHH_gldm_SmallDependenceHighGrayLevelEmphasis
wavelet-HLL_firstorder_InterquartileRange
wavelet-HLL_firstorder_Kurtosis
wavelet-HLL_glcm_JointAverage
wavelet-HLL_glcm_Contrast
wavelet-HLL_glcm_DifferenceVariance
wavelet-HLL_glcm_Imc1
wavelet-HLL_glcm_Idm
wavelet-HLL_glszm_GrayLevelNonUniformity
wavelet-HLL_glszm_LargeAreaEmphasis
wavelet-HLL_glszm_SizeZoneNonUniformityNormalized
wavelet-HLL_glszm_SmallAreaLowGrayLevelEmphasis
wavelet-HLL_glszm_ZonePercentage
wavelet-HLL_glrlm_LongRunEmphasis
wavelet-HLL_glrlm_ShortRunLowGrayLevelEmphasis
wavelet-HLL_ngtdm_Complexity
wavelet-HLL_ngtdm_Contrast
wavelet-HLL_gldm_DependenceNonUniformityNormalized
wavelet-HLL_gldm_LargeDependenceEmphasis
wavelet-HLL_gldm_LargeDependenceHighGrayLevelEmphasis
wavelet-HLH_firstorder_InterquartileRange
wavelet-HLH_firstorder_Kurtosis
wavelet-HLH_firstorder_MeanAbsoluteDeviation
wavelet-HLH_glcm_Contrast
wavelet-HLH_glcm_JointEntropy
wavelet-HLH_glcm_Imc1
wavelet-HLH_glcm_Idm
wavelet-HLH_glszm_GrayLevelNonUniformity
wavelet-HLH_glszm_LargeAreaEmphasis
wavelet-HLH_glszm_LargeAreaHighGrayLevelEmphasis
wavelet-HLH_glszm_SmallAreaLowGrayLevelEmphasis
wavelet-HLH_glrlm_LongRunEmphasis
wavelet-HLH_glrlm_ShortRunHighGrayLevelEmphasis
wavelet-HLH_glrlm_ShortRunLowGrayLevelEmphasis
wavelet-HLH_ngtdm_Contrast
wavelet-HLH_ngtdm_Strength
wavelet-HLH_gldm_DependenceNonUniformityNormalized
wavelet-HLH_gldm_LargeDependenceEmphasis
wavelet-HLH_gldm_SmallDependenceHighGrayLevelEmphasis
wavelet-HHL_firstorder_InterquartileRange
wavelet-HHL_firstorder_Kurtosis
wavelet-HHL_glcm_JointAverage
wavelet-HHL_glcm_JointEntropy
wavelet-HHL_glcm_Imc1
wavelet-HHL_glcm_Idm
wavelet-HHL_glcm_InverseVariance
wavelet-HHL_glszm_GrayLevelNonUniformity
wavelet-HHL_glszm_LargeAreaEmphasis
wavelet-HHL_glszm_LargeAreaHighGrayLevelEmphasis
wavelet-HHL_glszm_SizeZoneNonUniformityNormalized
wavelet-HHL_glszm_SmallAreaLowGrayLevelEmphasis
wavelet-HHL_glszm_ZonePercentage
wavelet-HHL_glrlm_LongRunEmphasis
wavelet-HHL_glrlm_ShortRunLowGrayLevelEmphasis
wavelet-HHL_ngtdm_Complexity
wavelet-HHL_ngtdm_Contrast
wavelet-HHL_gldm_DependenceNonUniformityNormalized
wavelet-HHL_gldm_LargeDependenceEmphasis
wavelet-HHL_gldm_LargeDependenceHighGrayLevelEmphasis
wavelet-HHL_gldm_SmallDependenceHighGrayLevelEmphasis
wavelet-HHH_firstorder_InterquartileRange
wavelet-HHH_glcm_JointAverage
wavelet-HHH_glcm_DifferenceVariance
wavelet-HHH_glcm_JointEntropy
wavelet-HHH_glcm_Imc1
wavelet-HHH_glcm_Idm
wavelet-HHH_glszm_GrayLevelNonUniformity
wavelet-HHH_glszm_LargeAreaEmphasis
wavelet-HHH_glszm_LargeAreaHighGrayLevelEmphasis
wavelet-HHH_glszm_SizeZoneNonUniformity
wavelet-HHH_ngtdm_Strength
wavelet-HHH_gldm_DependenceNonUniformityNormalized
wavelet-HHH_gldm_LargeDependenceEmphasis
wavelet-HHH_gldm_SmallDependenceHighGrayLevelEmphasis
wavelet-LLL_firstorder_Entropy
wavelet-LLL_glcm_ClusterProminence
wavelet-LLL_glcm_Contrast
wavelet-LLL_glcm_Imc1
wavelet-LLL_glcm_Id
wavelet-LLL_glszm_ZonePercentage
wavelet-LLL_glrlm_ShortRunLowGrayLevelEmphasis
wavelet-LLL_ngtdm_Complexity
wavelet-LLL_gldm_LargeDependenceEmphasis
wavelet-LLL_gldm_LargeDependenceHighGrayLevelEmphasis
wavelet-LLL_gldm_SmallDependenceLowGrayLevelEmphasis

## Sheet: Combine-2mm
original_shape_LeastAxisLength
original_shape_VoxelVolume
original_firstorder_InterquartileRange
original_firstorder_RootMeanSquared
original_glcm_Contrast
original_glcm_DifferenceVariance
original_glcm_JointEnergy
original_glcm_Imc1
original_glcm_Idm
original_glszm_LargeAreaEmphasis
original_glszm_LargeAreaHighGrayLevelEmphasis
original_glszm_SizeZoneNonUniformityNormalized
original_glrlm_LongRunHighGrayLevelEmphasis
original_glrlm_ShortRunLowGrayLevelEmphasis
original_gldm_DependenceNonUniformityNormalized
original_gldm_LargeDependenceEmphasis
log-sigma-3-0-mm-3D_firstorder_Mean
log-sigma-3-0-mm-3D_firstorder_Variance
log-sigma-3-0-mm-3D_glcm_JointAverage
log-sigma-3-0-mm-3D_glcm_ClusterProminence
log-sigma-3-0-mm-3D_glcm_Contrast
log-sigma-3-0-mm-3D_glcm_Idm
log-sigma-3-0-mm-3D_glszm_LargeAreaEmphasis
log-sigma-3-0-mm-3D_glszm_LargeAreaHighGrayLevelEmphasis
log-sigma-3-0-mm-3D_glszm_SizeZoneNonUniformityNormalized
log-sigma-3-0-mm-3D_glszm_SmallAreaHighGrayLevelEmphasis
log-sigma-3-0-mm-3D_glrlm_LongRunHighGrayLevelEmphasis
log-sigma-3-0-mm-3D_glrlm_ShortRunLowGrayLevelEmphasis
log-sigma-3-0-mm-3D_ngtdm_Contrast
log-sigma-3-0-mm-3D_gldm_LargeDependenceEmphasis
log-sigma-3-0-mm-3D_gldm_LargeDependenceHighGrayLevelEmphasis
log-sigma-5-0-mm-3D_firstorder_InterquartileRange
log-sigma-5-0-mm-3D_firstorder_RootMeanSquared
log-sigma-5-0-mm-3D_glcm_JointAverage
log-sigma-5-0-mm-3D_glcm_Contrast
log-sigma-5-0-mm-3D_glcm_DifferenceVariance
log-sigma-5-0-mm-3D_glcm_JointEntropy
log-sigma-5-0-mm-3D_glcm_Imc1
log-sigma-5-0-mm-3D_glcm_Idm
log-sigma-5-0-mm-3D_glszm_LargeAreaEmphasis
log-sigma-5-0-mm-3D_glszm_LargeAreaHighGrayLevelEmphasis
log-sigma-5-0-mm-3D_glszm_LargeAreaLowGrayLevelEmphasis
log-sigma-5-0-mm-3D_glszm_LowGrayLevelZoneEmphasis
log-sigma-5-0-mm-3D_glszm_SizeZoneNonUniformityNormalized
log-sigma-5-0-mm-3D_glszm_SmallAreaHighGrayLevelEmphasis
log-sigma-5-0-mm-3D_glszm_ZonePercentage
log-sigma-5-0-mm-3D_glrlm_LongRunEmphasis
log-sigma-5-0-mm-3D_glrlm_ShortRunLowGrayLevelEmphasis
log-sigma-5-0-mm-3D_gldm_DependenceNonUniformityNormalized
log-sigma-5-0-mm-3D_gldm_LargeDependenceEmphasis
log-sigma-5-0-mm-3D_gldm_LargeDependenceHighGrayLevelEmphasis
log-sigma-5-0-mm-3D_gldm_LargeDependenceLowGrayLevelEmphasis
wavelet-LLH_firstorder_InterquartileRange
wavelet-LLH_firstorder_Kurtosis
wavelet-LLH_firstorder_MeanAbsoluteDeviation
wavelet-LLH_firstorder_Mean
wavelet-LLH_firstorder_RobustMeanAbsoluteDeviation
wavelet-LLH_glcm_JointAverage
wavelet-LLH_glcm_Contrast
wavelet-LLH_glcm_DifferenceVariance
wavelet-LLH_glcm_JointEnergy
wavelet-LLH_glcm_JointEntropy
wavelet-LLH_glcm_Imc1
wavelet-LLH_glcm_Idm
wavelet-LLH_glcm_Id
wavelet-LLH_glszm_GrayLevelNonUniformity
wavelet-LLH_glszm_LargeAreaEmphasis
wavelet-LLH_glszm_LargeAreaHighGrayLevelEmphasis
wavelet-LLH_glszm_LowGrayLevelZoneEmphasis
wavelet-LLH_glszm_SizeZoneNonUniformityNormalized
wavelet-LLH_glszm_SmallAreaHighGrayLevelEmphasis
wavelet-LLH_glszm_SmallAreaLowGrayLevelEmphasis
wavelet-LLH_glszm_ZonePercentage
wavelet-LLH_glrlm_LongRunEmphasis
wavelet-LLH_glrlm_LongRunHighGrayLevelEmphasis
wavelet-LLH_glrlm_ShortRunLowGrayLevelEmphasis
wavelet-LLH_ngtdm_Complexity
wavelet-LLH_ngtdm_Contrast
wavelet-LLH_gldm_DependenceNonUniformityNormalized
wavelet-LLH_gldm_LargeDependenceEmphasis
wavelet-LLH_gldm_LargeDependenceHighGrayLevelEmphasis
wavelet-LHL_firstorder_InterquartileRange
wavelet-LHL_firstorder_Kurtosis
wavelet-LHL_firstorder_MeanAbsoluteDeviation
wavelet-LHL_glcm_JointAverage
wavelet-LHL_glcm_ClusterProminence
wavelet-LHL_glcm_Contrast
wavelet-LHL_glcm_Idm
wavelet-LHL_glszm_GrayLevelNonUniformity
wavelet-LHL_glszm_LargeAreaEmphasis
wavelet-LHL_glszm_LargeAreaHighGrayLevelEmphasis
wavelet-LHL_glszm_SizeZoneNonUniformityNormalized
wavelet-LHL_glszm_SmallAreaHighGrayLevelEmphasis
wavelet-LHL_glrlm_LongRunEmphasis
wavelet-LHL_glrlm_ShortRunLowGrayLevelEmphasis
wavelet-LHL_ngtdm_Complexity
wavelet-LHL_ngtdm_Contrast
wavelet-LHL_gldm_LargeDependenceEmphasis
wavelet-LHL_gldm_LargeDependenceHighGrayLevelEmphasis
wavelet-LHH_glcm_DifferenceVariance
wavelet-LHH_glcm_JointEntropy
wavelet-LHH_glcm_Imc1
wavelet-LHH_glcm_Idm
wavelet-LHH_glszm_GrayLevelNonUniformity
wavelet-LHH_glszm_LargeAreaEmphasis
wavelet-LHH_glszm_LargeAreaHighGrayLevelEmphasis
wavelet-LHH_glszm_SizeZoneNonUniformity
wavelet-LHH_glszm_SmallAreaHighGrayLevelEmphasis
wavelet-LHH_glszm_SmallAreaLowGrayLevelEmphasis
wavelet-LHH_glrlm_LongRunEmphasis
wavelet-LHH_glrlm_LowGrayLevelRunEmphasis
wavelet-LHH_gldm_LargeDependenceEmphasis
wavelet-LHH_gldm_LargeDependenceHighGrayLevelEmphasis
wavelet-HLL_firstorder_InterquartileRange
wavelet-HLL_firstorder_Kurtosis
wavelet-HLL_glcm_JointAverage
wavelet-HLL_glcm_Contrast
wavelet-HLL_glcm_Imc1
wavelet-HLL_glcm_Idm
wavelet-HLL_glszm_GrayLevelNonUniformity
wavelet-HLL_glszm_LargeAreaEmphasis
wavelet-HLL_glszm_LargeAreaHighGrayLevelEmphasis
wavelet-HLL_glszm_SizeZoneNonUniformityNormalized
wavelet-HLL_glszm_SmallAreaHighGrayLevelEmphasis
wavelet-HLL_glszm_ZonePercentage
wavelet-HLL_glrlm_LongRunEmphasis
wavelet-HLL_glrlm_ShortRunLowGrayLevelEmphasis
wavelet-HLL_ngtdm_Coarseness
wavelet-HLL_ngtdm_Complexity
wavelet-HLL_ngtdm_Contrast
wavelet-HLL_gldm_LargeDependenceEmphasis
wavelet-HLL_gldm_LargeDependenceHighGrayLevelEmphasis
wavelet-HLH_firstorder_10Percentile
wavelet-HLH_firstorder_InterquartileRange
wavelet-HLH_firstorder_Kurtosis
wavelet-HLH_firstorder_MeanAbsoluteDeviation
wavelet-HLH_glcm_Contrast
wavelet-HLH_glcm_DifferenceVariance
wavelet-HLH_glcm_JointEntropy
wavelet-HLH_glcm_Imc1
wavelet-HLH_glcm_Idm
wavelet-HLH_glszm_GrayLevelNonUniformity
wavelet-HLH_glszm_LargeAreaEmphasis
wavelet-HLH_glszm_LargeAreaHighGrayLevelEmphasis
wavelet-HLH_glszm_SmallAreaLowGrayLevelEmphasis
wavelet-HLH_glszm_ZonePercentage
wavelet-HLH_glrlm_LongRunEmphasis
wavelet-HLH_glrlm_LowGrayLevelRunEmphasis
wavelet-HLH_gldm_DependenceNonUniformityNormalized
wavelet-HLH_gldm_LargeDependenceEmphasis
wavelet-HLH_gldm_LargeDependenceHighGrayLevelEmphasis
wavelet-HLH_gldm_LargeDependenceLowGrayLevelEmphasis
wavelet-HLH_gldm_SmallDependenceHighGrayLevelEmphasis
wavelet-HHL_firstorder_InterquartileRange
wavelet-HHL_firstorder_Kurtosis
wavelet-HHL_firstorder_TotalEnergy
wavelet-HHL_glcm_JointAverage
wavelet-HHL_glcm_Idm
wavelet-HHL_glszm_GrayLevelNonUniformity
wavelet-HHL_glszm_GrayLevelNonUniformityNormalized
wavelet-HHL_glszm_LargeAreaEmphasis
wavelet-HHL_glszm_LargeAreaHighGrayLevelEmphasis
wavelet-HHL_glszm_SizeZoneNonUniformityNormalized
wavelet-HHL_glrlm_LongRunEmphasis
wavelet-HHL_glrlm_ShortRunLowGrayLevelEmphasis
wavelet-HHL_ngtdm_Coarseness
wavelet-HHL_ngtdm_Complexity
wavelet-HHL_ngtdm_Contrast
wavelet-HHL_gldm_DependenceNonUniformityNormalized
wavelet-HHL_gldm_LargeDependenceEmphasis
wavelet-HHL_gldm_LargeDependenceHighGrayLevelEmphasis
wavelet-HHH_firstorder_InterquartileRange
wavelet-HHH_glcm_JointAverage
wavelet-HHH_glcm_DifferenceVariance
wavelet-HHH_glcm_JointEntropy
wavelet-HHH_glcm_Imc1
wavelet-HHH_glcm_Idm
wavelet-HHH_glszm_GrayLevelNonUniformity
wavelet-HHH_glszm_LargeAreaEmphasis
wavelet-HHH_glszm_LargeAreaHighGrayLevelEmphasis
wavelet-HHH_glszm_SizeZoneNonUniformity
wavelet-HHH_glszm_SmallAreaHighGrayLevelEmphasis
wavelet-HHH_ngtdm_Strength
wavelet-HHH_gldm_DependenceNonUniformityNormalized
wavelet-HHH_gldm_LargeDependenceEmphasis
wavelet-HHH_gldm_SmallDependenceHighGrayLevelEmphasis
wavelet-LLL_firstorder_Mean
wavelet-LLL_glcm_JointAverage
wavelet-LLL_glcm_ClusterProminence
wavelet-LLL_glcm_Imc1
wavelet-LLL_glszm_LargeAreaEmphasis
wavelet-LLL_glszm_ZonePercentage
wavelet-LLL_glrlm_LongRunEmphasis
wavelet-LLL_glrlm_ShortRunLowGrayLevelEmphasis
wavelet-LLL_ngtdm_Complexity
wavelet-LLL_gldm_LargeDependenceHighGrayLevelEmphasis
wavelet-LLL_gldm_SmallDependenceLowGrayLevelEmphasis

## Sheet: Combine-3mm
original_shape_LeastAxisLength
original_shape_VoxelVolume
original_firstorder_InterquartileRange
original_firstorder_Mean
original_firstorder_RootMeanSquared
original_glcm_Contrast
original_glcm_DifferenceVariance
original_glcm_JointEnergy
original_glcm_Imc1
original_glszm_LargeAreaEmphasis
original_glszm_LargeAreaHighGrayLevelEmphasis
original_glszm_SizeZoneNonUniformityNormalized
original_glrlm_LongRunHighGrayLevelEmphasis
original_glrlm_ShortRunLowGrayLevelEmphasis
original_gldm_DependenceNonUniformityNormalized
original_gldm_LargeDependenceEmphasis
log-sigma-3-0-mm-3D_firstorder_Mean
log-sigma-3-0-mm-3D_glcm_JointAverage
log-sigma-3-0-mm-3D_glcm_ClusterProminence
log-sigma-3-0-mm-3D_glcm_Contrast
log-sigma-3-0-mm-3D_glcm_Idm
log-sigma-3-0-mm-3D_glcm_InverseVariance
log-sigma-3-0-mm-3D_glszm_LargeAreaEmphasis
log-sigma-3-0-mm-3D_glszm_LargeAreaHighGrayLevelEmphasis
log-sigma-3-0-mm-3D_glszm_SizeZoneNonUniformityNormalized
log-sigma-3-0-mm-3D_glszm_SmallAreaHighGrayLevelEmphasis
log-sigma-3-0-mm-3D_glrlm_LongRunEmphasis
log-sigma-3-0-mm-3D_glrlm_ShortRunLowGrayLevelEmphasis
log-sigma-3-0-mm-3D_ngtdm_Contrast
log-sigma-3-0-mm-3D_gldm_LargeDependenceEmphasis
log-sigma-3-0-mm-3D_gldm_LargeDependenceHighGrayLevelEmphasis
log-sigma-3-0-mm-3D_gldm_LargeDependenceLowGrayLevelEmphasis
log-sigma-5-0-mm-3D_firstorder_InterquartileRange
log-sigma-5-0-mm-3D_firstorder_Mean
log-sigma-5-0-mm-3D_firstorder_RootMeanSquared
log-sigma-5-0-mm-3D_glcm_JointAverage
log-sigma-5-0-mm-3D_glcm_Contrast
log-sigma-5-0-mm-3D_glcm_DifferenceVariance
log-sigma-5-0-mm-3D_glcm_JointEntropy
log-sigma-5-0-mm-3D_glcm_Imc1
log-sigma-5-0-mm-3D_glcm_Idm
log-sigma-5-0-mm-3D_glszm_LargeAreaEmphasis
log-sigma-5-0-mm-3D_glszm_LargeAreaHighGrayLevelEmphasis
log-sigma-5-0-mm-3D_glszm_SizeZoneNonUniformityNormalized
log-sigma-5-0-mm-3D_glszm_SmallAreaHighGrayLevelEmphasis
log-sigma-5-0-mm-3D_glszm_ZonePercentage
log-sigma-5-0-mm-3D_glrlm_LongRunEmphasis
log-sigma-5-0-mm-3D_glrlm_ShortRunLowGrayLevelEmphasis
log-sigma-5-0-mm-3D_ngtdm_Contrast
log-sigma-5-0-mm-3D_gldm_DependenceNonUniformityNormalized
log-sigma-5-0-mm-3D_gldm_LargeDependenceEmphasis
log-sigma-5-0-mm-3D_gldm_LargeDependenceHighGrayLevelEmphasis
log-sigma-5-0-mm-3D_gldm_LargeDependenceLowGrayLevelEmphasis
wavelet-LLH_firstorder_10Percentile
wavelet-LLH_firstorder_InterquartileRange
wavelet-LLH_firstorder_Kurtosis
wavelet-LLH_firstorder_MeanAbsoluteDeviation
wavelet-LLH_firstorder_Mean
wavelet-LLH_firstorder_RobustMeanAbsoluteDeviation
wavelet-LLH_glcm_JointAverage
wavelet-LLH_glcm_Contrast
wavelet-LLH_glcm_DifferenceVariance
wavelet-LLH_glcm_JointEnergy
wavelet-LLH_glcm_JointEntropy
wavelet-LLH_glcm_Imc1
wavelet-LLH_glcm_Idm
wavelet-LLH_glcm_Id
wavelet-LLH_glszm_GrayLevelNonUniformity
wavelet-LLH_glszm_LargeAreaEmphasis
wavelet-LLH_glszm_LargeAreaHighGrayLevelEmphasis
wavelet-LLH_glszm_LowGrayLevelZoneEmphasis
wavelet-LLH_glszm_SizeZoneNonUniformityNormalized
wavelet-LLH_glszm_SmallAreaLowGrayLevelEmphasis
wavelet-LLH_glszm_ZonePercentage
wavelet-LLH_glrlm_LongRunEmphasis
wavelet-LLH_glrlm_LongRunHighGrayLevelEmphasis
wavelet-LLH_glrlm_ShortRunLowGrayLevelEmphasis
wavelet-LLH_ngtdm_Complexity
wavelet-LLH_ngtdm_Contrast
wavelet-LLH_gldm_DependenceNonUniformityNormalized
wavelet-LLH_gldm_LargeDependenceEmphasis
wavelet-LLH_gldm_LargeDependenceHighGrayLevelEmphasis
wavelet-LLH_gldm_SmallDependenceHighGrayLevelEmphasis
wavelet-LHL_firstorder_InterquartileRange
wavelet-LHL_firstorder_Kurtosis
wavelet-LHL_firstorder_MeanAbsoluteDeviation
wavelet-LHL_glcm_JointAverage
wavelet-LHL_glcm_ClusterProminence
wavelet-LHL_glcm_Contrast
wavelet-LHL_glcm_Idm
wavelet-LHL_glszm_GrayLevelNonUniformity
wavelet-LHL_glszm_LargeAreaEmphasis
wavelet-LHL_glszm_LargeAreaHighGrayLevelEmphasis
wavelet-LHL_glszm_LowGrayLevelZoneEmphasis
wavelet-LHL_glszm_SizeZoneNonUniformityNormalized
wavelet-LHL_glszm_SmallAreaHighGrayLevelEmphasis
wavelet-LHL_glrlm_LongRunEmphasis
wavelet-LHL_glrlm_ShortRunLowGrayLevelEmphasis
wavelet-LHL_ngtdm_Complexity
wavelet-LHL_ngtdm_Contrast
wavelet-LHL_gldm_LargeDependenceEmphasis
wavelet-LHL_gldm_LargeDependenceHighGrayLevelEmphasis
wavelet-LHH_glcm_DifferenceVariance
wavelet-LHH_glcm_JointEntropy
wavelet-LHH_glcm_Imc1
wavelet-LHH_glcm_Idm
wavelet-LHH_glszm_GrayLevelNonUniformity
wavelet-LHH_glszm_LargeAreaEmphasis
wavelet-LHH_glszm_LargeAreaHighGrayLevelEmphasis
wavelet-LHH_glszm_SizeZoneNonUniformityNormalized
wavelet-LHH_glszm_SmallAreaHighGrayLevelEmphasis
wavelet-LHH_glrlm_LongRunEmphasis
wavelet-LHH_glrlm_LowGrayLevelRunEmphasis
wavelet-LHH_ngtdm_Strength
wavelet-LHH_gldm_LargeDependenceEmphasis
wavelet-LHH_gldm_SmallDependenceHighGrayLevelEmphasis
wavelet-HLL_firstorder_InterquartileRange
wavelet-HLL_firstorder_Kurtosis
wavelet-HLL_glcm_JointAverage
wavelet-HLL_glcm_Contrast
wavelet-HLL_glcm_DifferenceVariance
wavelet-HLL_glcm_Imc1
wavelet-HLL_glcm_Idm
wavelet-HLL_glszm_GrayLevelNonUniformity
wavelet-HLL_glszm_LargeAreaEmphasis
wavelet-HLL_glszm_LargeAreaHighGrayLevelEmphasis
wavelet-HLL_glszm_SizeZoneNonUniformityNormalized
wavelet-HLL_glszm_ZonePercentage
wavelet-HLL_glrlm_LongRunEmphasis
wavelet-HLL_glrlm_ShortRunLowGrayLevelEmphasis
wavelet-HLL_ngtdm_Coarseness
wavelet-HLL_ngtdm_Complexity
wavelet-HLL_ngtdm_Contrast
wavelet-HLL_ngtdm_Strength
wavelet-HLL_gldm_LargeDependenceEmphasis
wavelet-HLL_gldm_LargeDependenceHighGrayLevelEmphasis
wavelet-HLH_firstorder_InterquartileRange
wavelet-HLH_firstorder_Kurtosis
wavelet-HLH_firstorder_MeanAbsoluteDeviation
wavelet-HLH_glcm_Contrast
wavelet-HLH_glcm_DifferenceVariance
wavelet-HLH_glcm_JointEntropy
wavelet-HLH_glcm_Imc1
wavelet-HLH_glcm_Idm
wavelet-HLH_glszm_GrayLevelNonUniformity
wavelet-HLH_glszm_LargeAreaEmphasis
wavelet-HLH_glszm_LargeAreaHighGrayLevelEmphasis
wavelet-HLH_glszm_SmallAreaHighGrayLevelEmphasis
wavelet-HLH_glrlm_LongRunEmphasis
wavelet-HLH_glrlm_LowGrayLevelRunEmphasis
wavelet-HLH_glrlm_ShortRunHighGrayLevelEmphasis
wavelet-HLH_ngtdm_Strength
wavelet-HLH_gldm_DependenceNonUniformityNormalized
wavelet-HLH_gldm_LargeDependenceEmphasis
wavelet-HLH_gldm_SmallDependenceHighGrayLevelEmphasis
wavelet-HHL_firstorder_InterquartileRange
wavelet-HHL_firstorder_Kurtosis
wavelet-HHL_glcm_JointAverage
wavelet-HHL_glcm_Idm
wavelet-HHL_glcm_InverseVariance
wavelet-HHL_glszm_GrayLevelNonUniformity
wavelet-HHL_glszm_GrayLevelNonUniformityNormalized
wavelet-HHL_glszm_LargeAreaEmphasis
wavelet-HHL_glszm_LargeAreaHighGrayLevelEmphasis
wavelet-HHL_glszm_SizeZoneNonUniformityNormalized
wavelet-HHL_glrlm_LongRunEmphasis
wavelet-HHL_glrlm_ShortRunLowGrayLevelEmphasis
wavelet-HHL_ngtdm_Coarseness
wavelet-HHL_ngtdm_Complexity
wavelet-HHL_ngtdm_Contrast
wavelet-HHL_gldm_DependenceNonUniformityNormalized
wavelet-HHL_gldm_LargeDependenceEmphasis
wavelet-HHL_gldm_LargeDependenceHighGrayLevelEmphasis
wavelet-HHH_firstorder_InterquartileRange
wavelet-HHH_glcm_JointAverage
wavelet-HHH_glcm_DifferenceVariance
wavelet-HHH_glcm_JointEntropy
wavelet-HHH_glcm_Imc1
wavelet-HHH_glcm_Idm
wavelet-HHH_glszm_GrayLevelNonUniformity
wavelet-HHH_glszm_LargeAreaEmphasis
wavelet-HHH_glszm_LargeAreaHighGrayLevelEmphasis
wavelet-HHH_glszm_SizeZoneNonUniformity
wavelet-HHH_glrlm_ShortRunHighGrayLevelEmphasis
wavelet-HHH_ngtdm_Strength
wavelet-HHH_gldm_DependenceNonUniformityNormalized
wavelet-HHH_gldm_LargeDependenceEmphasis
wavelet-HHH_gldm_SmallDependenceHighGrayLevelEmphasis
wavelet-LLL_firstorder_Entropy
wavelet-LLL_glcm_JointAverage
wavelet-LLL_glcm_ClusterProminence
wavelet-LLL_glcm_Imc1
wavelet-LLL_glszm_LargeAreaEmphasis
wavelet-LLL_glszm_ZonePercentage
wavelet-LLL_glrlm_LongRunEmphasis
wavelet-LLL_glrlm_ShortRunLowGrayLevelEmphasis
wavelet-LLL_ngtdm_Complexity
wavelet-LLL_gldm_LargeDependenceHighGrayLevelEmphasis
wavelet-LLL_gldm_SmallDependenceLowGrayLevelEmphasis

## Sheet: Combine-4mm
original_shape_LeastAxisLength
original_shape_VoxelVolume
original_firstorder_InterquartileRange
original_firstorder_Mean
original_firstorder_RootMeanSquared
original_glcm_Contrast
original_glcm_DifferenceVariance
original_glcm_JointEnergy
original_glcm_Imc1
original_glszm_LargeAreaEmphasis
original_glszm_LargeAreaHighGrayLevelEmphasis
original_glszm_SizeZoneNonUniformityNormalized
original_glrlm_LongRunHighGrayLevelEmphasis
original_glrlm_ShortRunLowGrayLevelEmphasis
original_gldm_DependenceNonUniformityNormalized
original_gldm_LargeDependenceEmphasis
log-sigma-3-0-mm-3D_firstorder_Mean
log-sigma-3-0-mm-3D_glcm_JointAverage
log-sigma-3-0-mm-3D_glcm_ClusterProminence
log-sigma-3-0-mm-3D_glcm_Contrast
log-sigma-3-0-mm-3D_glcm_Idm
log-sigma-3-0-mm-3D_glcm_InverseVariance
log-sigma-3-0-mm-3D_glszm_LargeAreaEmphasis
log-sigma-3-0-mm-3D_glszm_LargeAreaHighGrayLevelEmphasis
log-sigma-3-0-mm-3D_glszm_SizeZoneNonUniformityNormalized
log-sigma-3-0-mm-3D_glszm_SmallAreaHighGrayLevelEmphasis
log-sigma-3-0-mm-3D_glrlm_LongRunEmphasis
log-sigma-3-0-mm-3D_glrlm_LongRunHighGrayLevelEmphasis
log-sigma-3-0-mm-3D_glrlm_ShortRunLowGrayLevelEmphasis
log-sigma-3-0-mm-3D_ngtdm_Contrast
log-sigma-3-0-mm-3D_gldm_LargeDependenceEmphasis
log-sigma-3-0-mm-3D_gldm_LargeDependenceHighGrayLevelEmphasis
log-sigma-5-0-mm-3D_firstorder_InterquartileRange
log-sigma-5-0-mm-3D_firstorder_Mean
log-sigma-5-0-mm-3D_firstorder_RootMeanSquared
log-sigma-5-0-mm-3D_glcm_JointAverage
log-sigma-5-0-mm-3D_glcm_Contrast
log-sigma-5-0-mm-3D_glcm_DifferenceVariance
log-sigma-5-0-mm-3D_glcm_JointEntropy
log-sigma-5-0-mm-3D_glcm_Imc1
log-sigma-5-0-mm-3D_glcm_Idm
log-sigma-5-0-mm-3D_glszm_LargeAreaEmphasis
log-sigma-5-0-mm-3D_glszm_LargeAreaHighGrayLevelEmphasis
log-sigma-5-0-mm-3D_glszm_SizeZoneNonUniformityNormalized
log-sigma-5-0-mm-3D_glszm_SmallAreaHighGrayLevelEmphasis
log-sigma-5-0-mm-3D_glszm_ZonePercentage
log-sigma-5-0-mm-3D_glrlm_LongRunEmphasis
log-sigma-5-0-mm-3D_glrlm_ShortRunLowGrayLevelEmphasis
log-sigma-5-0-mm-3D_ngtdm_Complexity
log-sigma-5-0-mm-3D_ngtdm_Contrast
log-sigma-5-0-mm-3D_gldm_DependenceNonUniformityNormalized
log-sigma-5-0-mm-3D_gldm_LargeDependenceEmphasis
log-sigma-5-0-mm-3D_gldm_LargeDependenceHighGrayLevelEmphasis
log-sigma-5-0-mm-3D_gldm_LargeDependenceLowGrayLevelEmphasis
wavelet-LLH_firstorder_InterquartileRange
wavelet-LLH_firstorder_Kurtosis
wavelet-LLH_firstorder_MeanAbsoluteDeviation
wavelet-LLH_firstorder_Mean
wavelet-LLH_firstorder_RobustMeanAbsoluteDeviation
wavelet-LLH_glcm_JointAverage
wavelet-LLH_glcm_Contrast
wavelet-LLH_glcm_DifferenceVariance
wavelet-LLH_glcm_JointEnergy
wavelet-LLH_glcm_JointEntropy
wavelet-LLH_glcm_Imc1
wavelet-LLH_glcm_Idm
wavelet-LLH_glcm_Id
wavelet-LLH_glszm_GrayLevelNonUniformity
wavelet-LLH_glszm_LargeAreaEmphasis
wavelet-LLH_glszm_LargeAreaHighGrayLevelEmphasis
wavelet-LLH_glszm_LowGrayLevelZoneEmphasis
wavelet-LLH_glszm_SizeZoneNonUniformityNormalized
wavelet-LLH_glszm_SmallAreaHighGrayLevelEmphasis
wavelet-LLH_glszm_SmallAreaLowGrayLevelEmphasis
wavelet-LLH_glszm_ZonePercentage
wavelet-LLH_glrlm_LongRunEmphasis
wavelet-LLH_glrlm_LongRunHighGrayLevelEmphasis
wavelet-LLH_glrlm_ShortRunLowGrayLevelEmphasis
wavelet-LLH_ngtdm_Complexity
wavelet-LLH_ngtdm_Contrast
wavelet-LLH_gldm_DependenceNonUniformityNormalized
wavelet-LLH_gldm_LargeDependenceEmphasis
wavelet-LLH_gldm_LargeDependenceHighGrayLevelEmphasis
wavelet-LHL_firstorder_InterquartileRange
wavelet-LHL_firstorder_Kurtosis
wavelet-LHL_firstorder_MeanAbsoluteDeviation
wavelet-LHL_glcm_JointAverage
wavelet-LHL_glcm_ClusterProminence
wavelet-LHL_glcm_Contrast
wavelet-LHL_glcm_Idm
wavelet-LHL_glszm_GrayLevelNonUniformity
wavelet-LHL_glszm_LargeAreaEmphasis
wavelet-LHL_glszm_LargeAreaHighGrayLevelEmphasis
wavelet-LHL_glszm_LowGrayLevelZoneEmphasis
wavelet-LHL_glszm_SizeZoneNonUniformityNormalized
wavelet-LHL_glszm_SmallAreaHighGrayLevelEmphasis
wavelet-LHL_glrlm_LongRunEmphasis
wavelet-LHL_glrlm_ShortRunLowGrayLevelEmphasis
wavelet-LHL_ngtdm_Complexity
wavelet-LHL_ngtdm_Contrast
wavelet-LHL_gldm_LargeDependenceEmphasis
wavelet-LHL_gldm_LargeDependenceHighGrayLevelEmphasis
wavelet-LHH_glcm_DifferenceVariance
wavelet-LHH_glcm_JointEntropy
wavelet-LHH_glcm_Imc1
wavelet-LHH_glcm_Idm
wavelet-LHH_glszm_GrayLevelNonUniformity
wavelet-LHH_glszm_LargeAreaEmphasis
wavelet-LHH_glszm_LargeAreaHighGrayLevelEmphasis
wavelet-LHH_glszm_SizeZoneNonUniformityNormalized
wavelet-LHH_glrlm_LongRunEmphasis
wavelet-LHH_glrlm_LowGrayLevelRunEmphasis
wavelet-LHH_gldm_LargeDependenceEmphasis
wavelet-LHH_gldm_LargeDependenceLowGrayLevelEmphasis
wavelet-HLL_firstorder_InterquartileRange
wavelet-HLL_firstorder_Kurtosis
wavelet-HLL_glcm_JointAverage
wavelet-HLL_glcm_Contrast
wavelet-HLL_glcm_DifferenceVariance
wavelet-HLL_glcm_Imc1
wavelet-HLL_glcm_Idm
wavelet-HLL_glszm_GrayLevelNonUniformity
wavelet-HLL_glszm_LargeAreaEmphasis
wavelet-HLL_glszm_LargeAreaHighGrayLevelEmphasis
wavelet-HLL_glszm_SizeZoneNonUniformityNormalized
wavelet-HLL_glszm_ZonePercentage
wavelet-HLL_glrlm_LongRunEmphasis
wavelet-HLL_glrlm_ShortRunLowGrayLevelEmphasis
wavelet-HLL_ngtdm_Complexity
wavelet-HLL_ngtdm_Contrast
wavelet-HLL_ngtdm_Strength
wavelet-HLL_gldm_LargeDependenceEmphasis
wavelet-HLL_gldm_LargeDependenceHighGrayLevelEmphasis
wavelet-HLH_firstorder_InterquartileRange
wavelet-HLH_firstorder_Kurtosis
wavelet-HLH_firstorder_MeanAbsoluteDeviation
wavelet-HLH_glcm_Contrast
wavelet-HLH_glcm_DifferenceVariance
wavelet-HLH_glcm_JointEntropy
wavelet-HLH_glcm_Imc1
wavelet-HLH_glcm_Idm
wavelet-HLH_glszm_GrayLevelNonUniformity
wavelet-HLH_glszm_LargeAreaEmphasis
wavelet-HLH_glszm_LargeAreaHighGrayLevelEmphasis
wavelet-HLH_glszm_ZonePercentage
wavelet-HLH_glrlm_LongRunEmphasis
wavelet-HLH_glrlm_LowGrayLevelRunEmphasis
wavelet-HLH_ngtdm_Strength
wavelet-HLH_gldm_DependenceNonUniformityNormalized
wavelet-HLH_gldm_LargeDependenceEmphasis
wavelet-HLH_gldm_LargeDependenceLowGrayLevelEmphasis
wavelet-HLH_gldm_SmallDependenceHighGrayLevelEmphasis
wavelet-HHL_firstorder_InterquartileRange
wavelet-HHL_firstorder_Kurtosis
wavelet-HHL_glcm_JointAverage
wavelet-HHL_glcm_Idm
wavelet-HHL_glcm_InverseVariance
wavelet-HHL_glszm_GrayLevelNonUniformity
wavelet-HHL_glszm_GrayLevelNonUniformityNormalized
wavelet-HHL_glszm_LargeAreaEmphasis
wavelet-HHL_glszm_LargeAreaHighGrayLevelEmphasis
wavelet-HHL_glszm_LargeAreaLowGrayLevelEmphasis
wavelet-HHL_glszm_SizeZoneNonUniformityNormalized
wavelet-HHL_glrlm_LongRunEmphasis
wavelet-HHL_glrlm_ShortRunLowGrayLevelEmphasis
wavelet-HHL_ngtdm_Coarseness
wavelet-HHL_ngtdm_Complexity
wavelet-HHL_ngtdm_Contrast
wavelet-HHL_gldm_DependenceNonUniformityNormalized
wavelet-HHL_gldm_LargeDependenceEmphasis
wavelet-HHL_gldm_LargeDependenceHighGrayLevelEmphasis
wavelet-HHH_firstorder_InterquartileRange
wavelet-HHH_glcm_JointAverage
wavelet-HHH_glcm_DifferenceVariance
wavelet-HHH_glcm_JointEntropy
wavelet-HHH_glcm_Imc1
wavelet-HHH_glcm_Idm
wavelet-HHH_glszm_GrayLevelNonUniformity
wavelet-HHH_glszm_LargeAreaEmphasis
wavelet-HHH_glszm_LargeAreaHighGrayLevelEmphasis
wavelet-HHH_glszm_SizeZoneNonUniformity
wavelet-HHH_glszm_SmallAreaHighGrayLevelEmphasis
wavelet-HHH_ngtdm_Strength
wavelet-HHH_gldm_DependenceNonUniformityNormalized
wavelet-HHH_gldm_LargeDependenceEmphasis
wavelet-HHH_gldm_SmallDependenceHighGrayLevelEmphasis
wavelet-LLL_firstorder_Entropy
wavelet-LLL_glcm_JointAverage
wavelet-LLL_glcm_ClusterProminence
wavelet-LLL_glcm_Imc1
wavelet-LLL_glszm_LargeAreaEmphasis
wavelet-LLL_glszm_ZonePercentage
wavelet-LLL_glrlm_LongRunEmphasis
wavelet-LLL_glrlm_ShortRunLowGrayLevelEmphasis
wavelet-LLL_ngtdm_Complexity
wavelet-LLL_gldm_LargeDependenceHighGrayLevelEmphasis
wavelet-LLL_gldm_SmallDependenceLowGrayLevelEmphasis

## Sheet: Combine-5mm
Table S1: The feaatures included of every region. The included features of every region. The included features of every region.
original_shape_LeastAxisLength
original_shape_VoxelVolume
original_firstorder_InterquartileRange
original_firstorder_Mean
original_firstorder_RootMeanSquared
original_glcm_ClusterProminence
original_glcm_Contrast
original_glcm_Imc1
original_glcm_Idm
original_glcm_InverseVariance
original_glszm_LargeAreaEmphasis
original_glszm_LargeAreaHighGrayLevelEmphasis
original_glszm_SizeZoneNonUniformityNormalized
original_glszm_SmallAreaHighGrayLevelEmphasis
original_glrlm_LongRunHighGrayLevelEmphasis
original_glrlm_ShortRunLowGrayLevelEmphasis
original_gldm_DependenceNonUniformityNormalized
original_gldm_LargeDependenceEmphasis
log-sigma-3-0-mm-3D_firstorder_Mean
log-sigma-3-0-mm-3D_firstorder_RobustMeanAbsoluteDeviation
log-sigma-3-0-mm-3D_glcm_JointAverage
log-sigma-3-0-mm-3D_glcm_ClusterProminence
log-sigma-3-0-mm-3D_glcm_Contrast
log-sigma-3-0-mm-3D_glcm_Idm
log-sigma-3-0-mm-3D_glcm_InverseVariance
log-sigma-3-0-mm-3D_glszm_LargeAreaEmphasis
log-sigma-3-0-mm-3D_glszm_LargeAreaHighGrayLevelEmphasis
log-sigma-3-0-mm-3D_glszm_SizeZoneNonUniformityNormalized
log-sigma-3-0-mm-3D_glszm_SmallAreaHighGrayLevelEmphasis
log-sigma-3-0-mm-3D_glrlm_LongRunEmphasis
log-sigma-3-0-mm-3D_glrlm_ShortRunLowGrayLevelEmphasis
log-sigma-3-0-mm-3D_gldm_DependenceNonUniformityNormalized
log-sigma-3-0-mm-3D_gldm_LargeDependenceEmphasis
log-sigma-3-0-mm-3D_gldm_LargeDependenceHighGrayLevelEmphasis
log-sigma-3-0-mm-3D_gldm_LargeDependenceLowGrayLevelEmphasis
log-sigma-3-0-mm-3D_gldm_SmallDependenceHighGrayLevelEmphasis
log-sigma-5-0-mm-3D_firstorder_InterquartileRange
log-sigma-5-0-mm-3D_firstorder_Mean
log-sigma-5-0-mm-3D_firstorder_RootMeanSquared
log-sigma-5-0-mm-3D_glcm_JointAverage
log-sigma-5-0-mm-3D_glcm_Contrast
log-sigma-5-0-mm-3D_glcm_JointEntropy
log-sigma-5-0-mm-3D_glcm_Imc1
log-sigma-5-0-mm-3D_glcm_Idm
log-sigma-5-0-mm-3D_glcm_InverseVariance
log-sigma-5-0-mm-3D_glszm_LargeAreaEmphasis
log-sigma-5-0-mm-3D_glszm_LargeAreaHighGrayLevelEmphasis
log-sigma-5-0-mm-3D_glszm_SizeZoneNonUniformityNormalized
log-sigma-5-0-mm-3D_glszm_SmallAreaHighGrayLevelEmphasis
log-sigma-5-0-mm-3D_glszm_SmallAreaLowGrayLevelEmphasis
log-sigma-5-0-mm-3D_glrlm_LongRunEmphasis
log-sigma-5-0-mm-3D_glrlm_ShortRunLowGrayLevelEmphasis
log-sigma-5-0-mm-3D_ngtdm_Complexity
log-sigma-5-0-mm-3D_ngtdm_Contrast
log-sigma-5-0-mm-3D_gldm_DependenceNonUniformityNormalized
log-sigma-5-0-mm-3D_gldm_LargeDependenceEmphasis
log-sigma-5-0-mm-3D_gldm_LargeDependenceHighGrayLevelEmphasis
log-sigma-5-0-mm-3D_gldm_LargeDependenceLowGrayLevelEmphasis
log-sigma-5-0-mm-3D_gldm_SmallDependenceHighGrayLevelEmphasis
wavelet-LLH_firstorder_10Percentile
wavelet-LLH_firstorder_InterquartileRange
wavelet-LLH_firstorder_Kurtosis
wavelet-LLH_firstorder_MeanAbsoluteDeviation
wavelet-LLH_firstorder_Mean
wavelet-LLH_firstorder_RobustMeanAbsoluteDeviation
wavelet-LLH_glcm_JointAverage
wavelet-LLH_glcm_Contrast
wavelet-LLH_glcm_JointEntropy
wavelet-LLH_glcm_Imc1
wavelet-LLH_glcm_Idm
wavelet-LLH_glcm_Id
wavelet-LLH_glcm_InverseVariance
wavelet-LLH_glszm_GrayLevelNonUniformity
wavelet-LLH_glszm_LargeAreaEmphasis
wavelet-LLH_glszm_LargeAreaHighGrayLevelEmphasis
wavelet-LLH_glszm_LowGrayLevelZoneEmphasis
wavelet-LLH_glszm_SizeZoneNonUniformityNormalized
wavelet-LLH_glszm_SmallAreaHighGrayLevelEmphasis
wavelet-LLH_glszm_ZonePercentage
wavelet-LLH_glrlm_LongRunEmphasis
wavelet-LLH_glrlm_ShortRunLowGrayLevelEmphasis
wavelet-LLH_ngtdm_Complexity
wavelet-LLH_ngtdm_Contrast
wavelet-LLH_ngtdm_Strength
wavelet-LLH_gldm_DependenceNonUniformityNormalized
wavelet-LLH_gldm_LargeDependenceEmphasis
wavelet-LLH_gldm_LargeDependenceHighGrayLevelEmphasis
wavelet-LLH_gldm_LargeDependenceLowGrayLevelEmphasis
wavelet-LLH_gldm_SmallDependenceHighGrayLevelEmphasis
wavelet-LHL_firstorder_InterquartileRange
wavelet-LHL_firstorder_Kurtosis
wavelet-LHL_firstorder_MeanAbsoluteDeviation
wavelet-LHL_glcm_JointAverage
wavelet-LHL_glcm_ClusterProminence
wavelet-LHL_glcm_Contrast
wavelet-LHL_glcm_Imc1
wavelet-LHL_glcm_Idm
wavelet-LHL_glcm_InverseVariance
wavelet-LHL_glszm_GrayLevelNonUniformity
wavelet-LHL_glszm_LargeAreaEmphasis
wavelet-LHL_glszm_LargeAreaHighGrayLevelEmphasis
wavelet-LHL_glszm_LowGrayLevelZoneEmphasis
wavelet-LHL_glszm_SizeZoneNonUniformityNormalized
wavelet-LHL_glrlm_LongRunEmphasis
wavelet-LHL_glrlm_ShortRunLowGrayLevelEmphasis
wavelet-LHL_ngtdm_Complexity
wavelet-LHL_ngtdm_Contrast
wavelet-LHL_ngtdm_Strength
wavelet-LHL_gldm_LargeDependenceEmphasis
wavelet-LHL_gldm_LargeDependenceHighGrayLevelEmphasis
wavelet-LHL_gldm_SmallDependenceHighGrayLevelEmphasis
wavelet-LHH_glcm_DifferenceVariance
wavelet-LHH_glcm_JointEntropy
wavelet-LHH_glcm_Imc1
wavelet-LHH_glcm_Idm
wavelet-LHH_glszm_GrayLevelNonUniformity
wavelet-LHH_glszm_LargeAreaEmphasis
wavelet-LHH_glszm_LargeAreaHighGrayLevelEmphasis
wavelet-LHH_glszm_SizeZoneNonUniformityNormalized
wavelet-LHH_glszm_SmallAreaHighGrayLevelEmphasis
wavelet-LHH_glrlm_LongRunEmphasis
wavelet-LHH_glrlm_LowGrayLevelRunEmphasis
wavelet-LHH_ngtdm_Complexity
wavelet-LHH_ngtdm_Strength
wavelet-LHH_gldm_LargeDependenceEmphasis
wavelet-LHH_gldm_SmallDependenceHighGrayLevelEmphasis
wavelet-HLL_firstorder_InterquartileRange
wavelet-HLL_firstorder_Kurtosis
wavelet-HLL_glcm_JointAverage
wavelet-HLL_glcm_Contrast
wavelet-HLL_glcm_JointEnergy
wavelet-HLL_glcm_Imc1
wavelet-HLL_glcm_Idm
wavelet-HLL_glcm_InverseVariance
wavelet-HLL_glszm_GrayLevelNonUniformity
wavelet-HLL_glszm_LargeAreaEmphasis
wavelet-HLL_glszm_LargeAreaHighGrayLevelEmphasis
wavelet-HLL_glszm_SizeZoneNonUniformityNormalized
wavelet-HLL_glszm_ZonePercentage
wavelet-HLL_glrlm_LongRunEmphasis
wavelet-HLL_glrlm_ShortRunLowGrayLevelEmphasis
wavelet-HLL_ngtdm_Complexity
wavelet-HLL_ngtdm_Contrast
wavelet-HLL_ngtdm_Strength
wavelet-HLL_gldm_LargeDependenceEmphasis
wavelet-HLL_gldm_LargeDependenceHighGrayLevelEmphasis
wavelet-HLH_firstorder_InterquartileRange
wavelet-HLH_firstorder_Kurtosis
wavelet-HLH_firstorder_MeanAbsoluteDeviation
wavelet-HLH_glcm_Contrast
wavelet-HLH_glcm_DifferenceVariance
wavelet-HLH_glcm_JointEntropy
wavelet-HLH_glcm_Imc1
wavelet-HLH_glcm_Idm
wavelet-HLH_glszm_GrayLevelNonUniformity
wavelet-HLH_glszm_LargeAreaEmphasis
wavelet-HLH_glszm_LargeAreaHighGrayLevelEmphasis
wavelet-HLH_glrlm_LongRunEmphasis
wavelet-HLH_glrlm_LowGrayLevelRunEmphasis
wavelet-HLH_glrlm_ShortRunHighGrayLevelEmphasis
wavelet-HLH_ngtdm_Contrast
wavelet-HLH_ngtdm_Strength
wavelet-HLH_gldm_DependenceNonUniformityNormalized
wavelet-HLH_gldm_LargeDependenceEmphasis
wavelet-HLH_gldm_SmallDependenceHighGrayLevelEmphasis
wavelet-HHL_firstorder_InterquartileRange
wavelet-HHL_firstorder_Kurtosis
wavelet-HHL_glcm_JointAverage
wavelet-HHL_glcm_JointEntropy
wavelet-HHL_glcm_Idm
wavelet-HHL_glcm_InverseVariance
wavelet-HHL_glszm_GrayLevelNonUniformity
wavelet-HHL_glszm_LargeAreaEmphasis
wavelet-HHL_glszm_LargeAreaHighGrayLevelEmphasis
wavelet-HHL_glszm_SizeZoneNonUniformityNormalized
wavelet-HHL_glszm_SmallAreaHighGrayLevelEmphasis
wavelet-HHL_glrlm_LongRunEmphasis
wavelet-HHL_glrlm_ShortRunLowGrayLevelEmphasis
wavelet-HHL_ngtdm_Complexity
wavelet-HHL_ngtdm_Strength
wavelet-HHL_gldm_DependenceNonUniformityNormalized
wavelet-HHL_gldm_LargeDependenceEmphasis
wavelet-HHL_gldm_LargeDependenceHighGrayLevelEmphasis
wavelet-HHH_firstorder_InterquartileRange
wavelet-HHH_glcm_JointAverage
wavelet-HHH_glcm_DifferenceVariance
wavelet-HHH_glcm_JointEntropy
wavelet-HHH_glcm_Imc1
wavelet-HHH_glcm_Idm
wavelet-HHH_glszm_GrayLevelNonUniformity
wavelet-HHH_glszm_LargeAreaEmphasis
wavelet-HHH_glszm_LargeAreaHighGrayLevelEmphasis
wavelet-HHH_glszm_SizeZoneNonUniformity
wavelet-HHH_glszm_SmallAreaHighGrayLevelEmphasis
wavelet-HHH_glszm_SmallAreaLowGrayLevelEmphasis
wavelet-HHH_gldm_DependenceNonUniformityNormalized
wavelet-HHH_gldm_LargeDependenceEmphasis
wavelet-HHH_gldm_SmallDependenceHighGrayLevelEmphasis
wavelet-LLL_firstorder_Entropy
wavelet-LLL_glcm_JointAverage
wavelet-LLL_glcm_Imc1
wavelet-LLL_glcm_Idm
wavelet-LLL_glszm_LargeAreaEmphasis
wavelet-LLL_glszm_ZonePercentage
wavelet-LLL_glrlm_LongRunEmphasis
wavelet-LLL_glrlm_ShortRunLowGrayLevelEmphasis
wavelet-LLL_ngtdm_Complexity
wavelet-LLL_gldm_LargeDependenceHighGrayLevelEmphasis
wavelet-LLL_gldm_SmallDependenceLowGrayLevelEmphasis

## Sheet: Whole-Tumor
original_shape_LeastAxisLength
original_shape_VoxelVolume
original_firstorder_Median
original_firstorder_RootMeanSquared
original_glcm_JointAverage
original_glcm_Contrast
original_glcm_Imc1
original_glcm_Idm
original_glszm_LargeAreaEmphasis
original_glszm_LargeAreaHighGrayLevelEmphasis
original_glszm_SizeZoneNonUniformityNormalized
original_glrlm_LongRunHighGrayLevelEmphasis
original_glrlm_ShortRunLowGrayLevelEmphasis
original_ngtdm_Complexity
original_gldm_DependenceNonUniformityNormalized
original_gldm_LargeDependenceEmphasis
log-sigma-3-0-mm-3D_glcm_JointAverage
log-sigma-3-0-mm-3D_glcm_ClusterProminence
log-sigma-3-0-mm-3D_glcm_Contrast
log-sigma-3-0-mm-3D_glcm_Idm
log-sigma-3-0-mm-3D_glszm_GrayLevelNonUniformity
log-sigma-3-0-mm-3D_glszm_LargeAreaEmphasis
log-sigma-3-0-mm-3D_glszm_LargeAreaHighGrayLevelEmphasis
log-sigma-3-0-mm-3D_glszm_SizeZoneNonUniformityNormalized
log-sigma-3-0-mm-3D_glszm_SmallAreaHighGrayLevelEmphasis
log-sigma-3-0-mm-3D_glrlm_LongRunEmphasis
log-sigma-3-0-mm-3D_glrlm_LongRunHighGrayLevelEmphasis
log-sigma-3-0-mm-3D_glrlm_ShortRunLowGrayLevelEmphasis
log-sigma-3-0-mm-3D_ngtdm_Contrast
log-sigma-3-0-mm-3D_gldm_DependenceNonUniformity
log-sigma-3-0-mm-3D_gldm_LargeDependenceEmphasis
log-sigma-3-0-mm-3D_gldm_LargeDependenceHighGrayLevelEmphasis
log-sigma-5-0-mm-3D_firstorder_InterquartileRange
log-sigma-5-0-mm-3D_firstorder_Mean
log-sigma-5-0-mm-3D_firstorder_RootMeanSquared
log-sigma-5-0-mm-3D_firstorder_Variance
log-sigma-5-0-mm-3D_glcm_JointAverage
log-sigma-5-0-mm-3D_glcm_Contrast
log-sigma-5-0-mm-3D_glcm_JointEntropy
log-sigma-5-0-mm-3D_glcm_Imc1
log-sigma-5-0-mm-3D_glcm_Idm
log-sigma-5-0-mm-3D_glszm_GrayLevelNonUniformity
log-sigma-5-0-mm-3D_glszm_LargeAreaEmphasis
log-sigma-5-0-mm-3D_glszm_LargeAreaHighGrayLevelEmphasis
log-sigma-5-0-mm-3D_glszm_LargeAreaLowGrayLevelEmphasis
log-sigma-5-0-mm-3D_glszm_LowGrayLevelZoneEmphasis
log-sigma-5-0-mm-3D_glszm_SizeZoneNonUniformityNormalized
log-sigma-5-0-mm-3D_glszm_SmallAreaHighGrayLevelEmphasis
log-sigma-5-0-mm-3D_glszm_ZonePercentage
log-sigma-5-0-mm-3D_glrlm_LongRunHighGrayLevelEmphasis
log-sigma-5-0-mm-3D_glrlm_ShortRunLowGrayLevelEmphasis
log-sigma-5-0-mm-3D_ngtdm_Complexity
log-sigma-5-0-mm-3D_ngtdm_Contrast
log-sigma-5-0-mm-3D_gldm_DependenceNonUniformityNormalized
log-sigma-5-0-mm-3D_gldm_LargeDependenceEmphasis
log-sigma-5-0-mm-3D_gldm_LargeDependenceHighGrayLevelEmphasis
wavelet-LLH_firstorder_InterquartileRange
wavelet-LLH_firstorder_Kurtosis
wavelet-LLH_firstorder_MeanAbsoluteDeviation
wavelet-LLH_firstorder_Mean
wavelet-LLH_firstorder_RobustMeanAbsoluteDeviation
wavelet-LLH_glcm_JointAverage
wavelet-LLH_glcm_Contrast
wavelet-LLH_glcm_JointEnergy
wavelet-LLH_glcm_JointEntropy
wavelet-LLH_glcm_Imc1
wavelet-LLH_glcm_Idm
wavelet-LLH_glcm_Id
wavelet-LLH_glszm_GrayLevelNonUniformity
wavelet-LLH_glszm_LargeAreaEmphasis
wavelet-LLH_glszm_LargeAreaHighGrayLevelEmphasis
wavelet-LLH_glszm_LowGrayLevelZoneEmphasis
wavelet-LLH_glszm_SizeZoneNonUniformityNormalized
wavelet-LLH_glszm_SmallAreaHighGrayLevelEmphasis
wavelet-LLH_glszm_SmallAreaLowGrayLevelEmphasis
wavelet-LLH_glszm_ZonePercentage
wavelet-LLH_glrlm_LongRunEmphasis
wavelet-LLH_glrlm_LongRunHighGrayLevelEmphasis
wavelet-LLH_glrlm_ShortRunLowGrayLevelEmphasis
wavelet-LLH_ngtdm_Complexity
wavelet-LLH_ngtdm_Contrast
wavelet-LLH_gldm_DependenceNonUniformityNormalized
wavelet-LLH_gldm_LargeDependenceEmphasis
wavelet-LLH_gldm_LargeDependenceHighGrayLevelEmphasis
wavelet-LHL_firstorder_Entropy
wavelet-LHL_firstorder_InterquartileRange
wavelet-LHL_firstorder_Kurtosis
wavelet-LHL_firstorder_MeanAbsoluteDeviation
wavelet-LHL_glcm_JointAverage
wavelet-LHL_glcm_ClusterProminence
wavelet-LHL_glcm_Contrast
wavelet-LHL_glcm_Idm
wavelet-LHL_glszm_GrayLevelNonUniformity
wavelet-LHL_glszm_LargeAreaEmphasis
wavelet-LHL_glszm_LargeAreaHighGrayLevelEmphasis
wavelet-LHL_glszm_SizeZoneNonUniformityNormalized
wavelet-LHL_glrlm_LongRunEmphasis
wavelet-LHL_glrlm_ShortRunLowGrayLevelEmphasis
wavelet-LHL_ngtdm_Complexity
wavelet-LHL_ngtdm_Contrast
wavelet-LHL_gldm_LargeDependenceEmphasis
wavelet-LHL_gldm_LargeDependenceHighGrayLevelEmphasis
wavelet-LHH_glcm_DifferenceVariance
wavelet-LHH_glcm_JointEntropy
wavelet-LHH_glcm_Imc1
wavelet-LHH_glcm_Idm
wavelet-LHH_glcm_Idn
wavelet-LHH_glszm_GrayLevelNonUniformity
wavelet-LHH_glszm_LargeAreaEmphasis
wavelet-LHH_glszm_LargeAreaHighGrayLevelEmphasis
wavelet-LHH_glszm_SizeZoneNonUniformityNormalized
wavelet-LHH_glszm_SmallAreaHighGrayLevelEmphasis
wavelet-LHH_glszm_SmallAreaLowGrayLevelEmphasis
wavelet-LHH_glrlm_LongRunEmphasis
wavelet-LHH_glrlm_LongRunHighGrayLevelEmphasis
wavelet-LHH_glrlm_LowGrayLevelRunEmphasis
wavelet-LHH_ngtdm_Strength
wavelet-LHH_gldm_LargeDependenceEmphasis
wavelet-LHH_gldm_LargeDependenceHighGrayLevelEmphasis
wavelet-LHH_gldm_SmallDependenceHighGrayLevelEmphasis
wavelet-HLL_firstorder_Entropy
wavelet-HLL_firstorder_InterquartileRange
wavelet-HLL_firstorder_Kurtosis
wavelet-HLL_glcm_JointAverage
wavelet-HLL_glcm_Contrast
wavelet-HLL_glcm_DifferenceVariance
wavelet-HLL_glcm_JointEnergy
wavelet-HLL_glcm_Imc1
wavelet-HLL_glcm_Idm
wavelet-HLL_glszm_GrayLevelNonUniformity
wavelet-HLL_glszm_LargeAreaEmphasis
wavelet-HLL_glszm_LargeAreaHighGrayLevelEmphasis
wavelet-HLL_glszm_SizeZoneNonUniformityNormalized
wavelet-HLL_glszm_ZonePercentage
wavelet-HLL_glrlm_GrayLevelNonUniformity
wavelet-HLL_glrlm_LongRunEmphasis
wavelet-HLL_glrlm_LongRunHighGrayLevelEmphasis
wavelet-HLL_glrlm_ShortRunLowGrayLevelEmphasis
wavelet-HLL_ngtdm_Coarseness
wavelet-HLL_ngtdm_Complexity
wavelet-HLL_ngtdm_Contrast
wavelet-HLL_gldm_LargeDependenceEmphasis
wavelet-HLL_gldm_LargeDependenceHighGrayLevelEmphasis
wavelet-HLH_firstorder_10Percentile
wavelet-HLH_firstorder_InterquartileRange
wavelet-HLH_firstorder_Kurtosis
wavelet-HLH_firstorder_MeanAbsoluteDeviation
wavelet-HLH_glcm_ClusterProminence
wavelet-HLH_glcm_Contrast
wavelet-HLH_glcm_JointEntropy
wavelet-HLH_glcm_Imc1
wavelet-HLH_glcm_Idm
wavelet-HLH_glcm_Idn
wavelet-HLH_glszm_GrayLevelNonUniformity
wavelet-HLH_glszm_LargeAreaEmphasis
wavelet-HLH_glszm_LargeAreaHighGrayLevelEmphasis
wavelet-HLH_glszm_SmallAreaHighGrayLevelEmphasis
wavelet-HLH_glszm_SmallAreaLowGrayLevelEmphasis
wavelet-HLH_glszm_ZonePercentage
wavelet-HLH_glrlm_LongRunEmphasis
wavelet-HLH_glrlm_LongRunHighGrayLevelEmphasis
wavelet-HLH_glrlm_LowGrayLevelRunEmphasis
wavelet-HLH_gldm_DependenceNonUniformityNormalized
wavelet-HLH_gldm_LargeDependenceEmphasis
wavelet-HLH_gldm_LargeDependenceHighGrayLevelEmphasis
wavelet-HLH_gldm_SmallDependenceHighGrayLevelEmphasis
wavelet-HHL_firstorder_InterquartileRange
wavelet-HHL_firstorder_Kurtosis
wavelet-HHL_firstorder_TotalEnergy
wavelet-HHL_glcm_JointAverage
wavelet-HHL_glcm_Idm
wavelet-HHL_glszm_GrayLevelNonUniformity
wavelet-HHL_glszm_GrayLevelNonUniformityNormalized
wavelet-HHL_glszm_LargeAreaEmphasis
wavelet-HHL_glszm_LargeAreaHighGrayLevelEmphasis
wavelet-HHL_glszm_SizeZoneNonUniformityNormalized
wavelet-HHL_glrlm_LongRunEmphasis
wavelet-HHL_glrlm_LongRunHighGrayLevelEmphasis
wavelet-HHL_glrlm_ShortRunLowGrayLevelEmphasis
wavelet-HHL_ngtdm_Coarseness
wavelet-HHL_ngtdm_Complexity
wavelet-HHL_ngtdm_Contrast
wavelet-HHL_gldm_DependenceNonUniformityNormalized
wavelet-HHL_gldm_LargeDependenceEmphasis
wavelet-HHL_gldm_LargeDependenceHighGrayLevelEmphasis
wavelet-HHH_firstorder_InterquartileRange
wavelet-HHH_firstorder_Kurtosis
wavelet-HHH_glcm_DifferenceVariance
wavelet-HHH_glcm_JointEntropy
wavelet-HHH_glcm_Imc1
wavelet-HHH_glcm_Idm
wavelet-HHH_glcm_Idn
wavelet-HHH_glszm_GrayLevelNonUniformity
wavelet-HHH_glszm_LargeAreaEmphasis
wavelet-HHH_glszm_LargeAreaHighGrayLevelEmphasis
wavelet-HHH_glszm_SizeZoneNonUniformity
wavelet-HHH_glszm_SizeZoneNonUniformityNormalized
wavelet-HHH_glszm_SmallAreaHighGrayLevelEmphasis
wavelet-HHH_glszm_SmallAreaLowGrayLevelEmphasis
wavelet-HHH_glrlm_LongRunHighGrayLevelEmphasis
wavelet-HHH_ngtdm_Strength
wavelet-HHH_gldm_DependenceNonUniformity
wavelet-HHH_gldm_DependenceNonUniformityNormalized
wavelet-HHH_gldm_LargeDependenceEmphasis
wavelet-HHH_gldm_LargeDependenceHighGrayLevelEmphasis
wavelet-HHH_gldm_SmallDependenceHighGrayLevelEmphasis
wavelet-LLL_firstorder_Mean
wavelet-LLL_firstorder_RootMeanSquared
wavelet-LLL_glcm_ClusterProminence
wavelet-LLL_glcm_Contrast
wavelet-LLL_glcm_Imc1
wavelet-LLL_glszm_LargeAreaEmphasis
wavelet-LLL_glszm_ZonePercentage
wavelet-LLL_glrlm_LongRunEmphasis
wavelet-LLL_glrlm_ShortRunLowGrayLevelEmphasis
wavelet-LLL_ngtdm_Complexity
wavelet-LLL_gldm_LargeDependenceHighGrayLevelEmphasis
wavelet-LLL_gldm_SmallDependenceLowGrayLevelEmphasis
